# Supplementary material for: Mechanistic insights into nitric oxide generation from nitrite via O-atom transfer in the unsymmetrical β-diketiminato copper(ii) nitrite complex
Source: Royal Society of Chemistry journal article supplement (doi:10.1039/d4dt02359e), 2024-01-01
Supplement: d4dt02359e2.pdf [file d4dt02359e2.pdf]

## Supporting Information

### **Mechanistic Insights into Nitric Oxide Generation from Nitrite via O-atom Transfer in the Unsymmetrical $\beta$ -Diketiminato Copper(II) Nitrite Complex**

*Yi-Rong Hsiang*<sup>†,1,2</sup>, *Naorem Jemes Meitei*<sup>‡,2</sup>, *Gifta Evangeline Henry*<sup>2,3</sup>, *Sodio C. N. Hsu*<sup>2, 4\*</sup>,

*Ya-Fan Lin*<sup>†\*</sup>.

1. Department of Chemistry, National Dong Hwa University, Taiwan

2. Department of Medicinal and Applied Chemistry, Kaohsiung Medical University, Taiwan

3. PG and Research Department of Chemistry, Bishop Heber College affiliated to Bharathidasan University, Tiruchirapalli 620017, India

4. Department of Medical Research, Kaohsiung Medical University Hospital, Taiwan

<sup>‡</sup>These authors contributed equally to this work

<sup>†</sup>Current affiliation: Department of Chemistry, National Taiwan Normal University, Taipei 11677, Taiwan

\*E-mail: [yafan@gms.ndhu.edu.tw](mailto:yafan@gms.ndhu.edu.tw); [sodiohsu@kmu.edu.tw](mailto:sodiohsu@kmu.edu.tw)

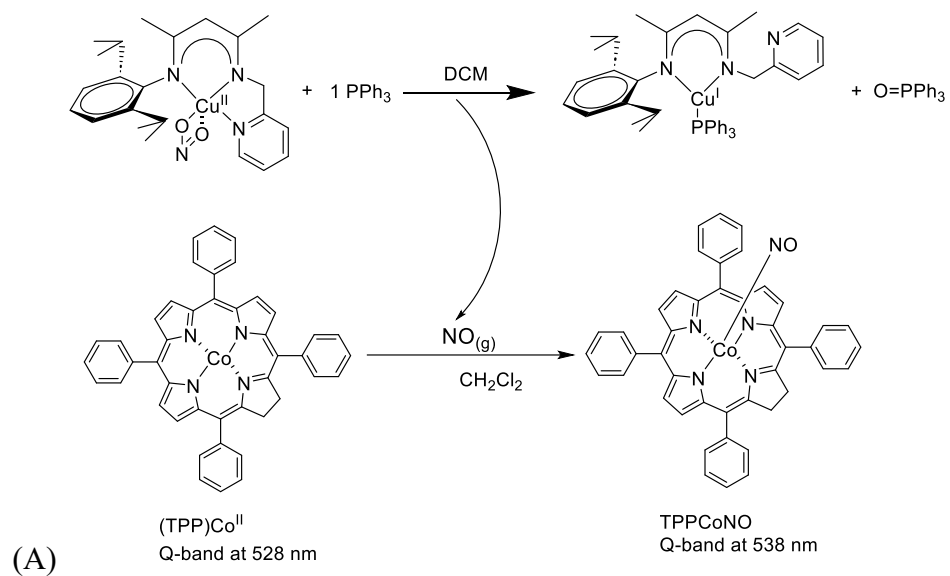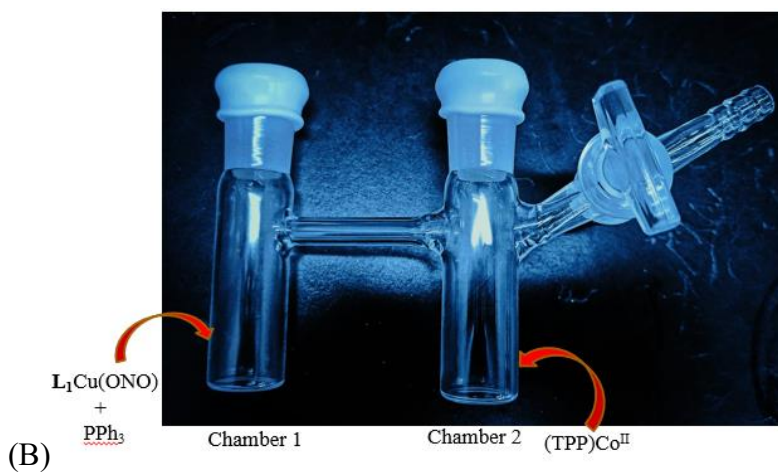

**Figure S1.** (A) A representative scheme showing NO generation (in Chamber 1) and NO trapping (in Chamber 2). (B) A pictorial demonstration of the “H-tube” setup utilized for the NO trapping experiments. The reaction is monitored for more than 3 times for better accuracy.

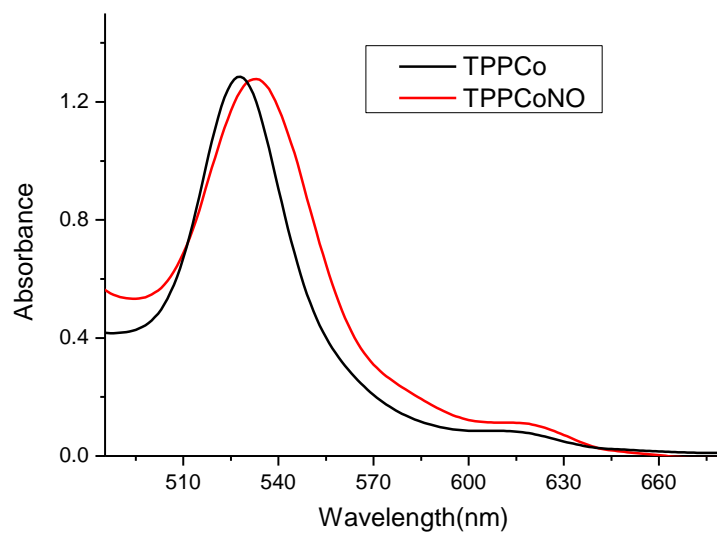

**Figure S2.** UV-Vis spectra (2 mM in  $\text{CH}_2\text{Cl}_2$ ) of  $[(\text{TPP})\text{Co}]$  (black trace) and  $[(\text{TPP})\text{CoNO}]$  (red trace) generated by reacting  $[(\text{TPP})\text{Co}]$  with NO released from the mixture of  $\text{LCu}^{\text{II}}\text{ONO}$  and 1 equivalent of  $\text{PPh}_3$ . The wavelength shift from 528 nm for  $[(\text{TPP})\text{Co}]$  to 532.4 nm for  $[(\text{TPP})\text{CoNO}]$  is observed. The amount of NO generated was calculated using the calibration curve in Figure S3B and aligns with the reported literature.<sup>1</sup> The cuvette used for these measurements had a 1 cm path length.

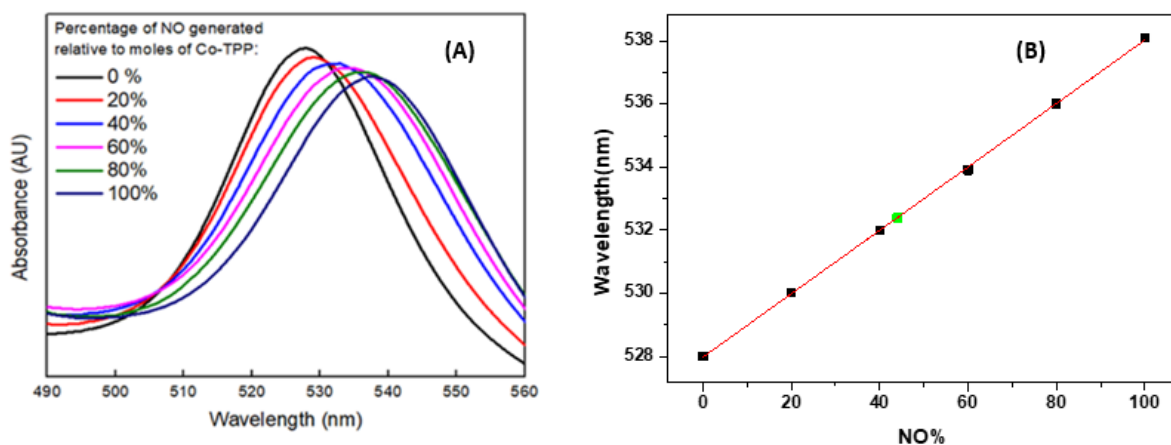

**Figure S3.** (A) UV-Vis spectra showing the absorbance shift of cobalt(II) porphyrin [(TPP)Co] (2 mM concentration) as NO complexation increases. A calibration curve was constructed by exposing [(TPP)Co] to known concentrations of NO in N<sub>2</sub> (160, 320, 480, 640, and 800 ppm). The peak shift from  $\lambda_{\text{max}} \sim 528$  nm to  $\sim 538$  nm was observed, dependent on NO concentration, and the responses were plotted against NO levels. This data was used to generate a graph of  $\lambda_{\text{max}}$  shift versus the amount of NO generated. (B) The calibration curve, plotted from the peak maxima, demonstrates a linear relationship between the absorbance shift and the percentage of NO complexation. The green marker indicates the amount of NO released from LCu<sup>II</sup>ONO upon treatment with 1 equivalent of PPh<sub>3</sub>. All measurements were taken in a 1 cm path length cuvette.

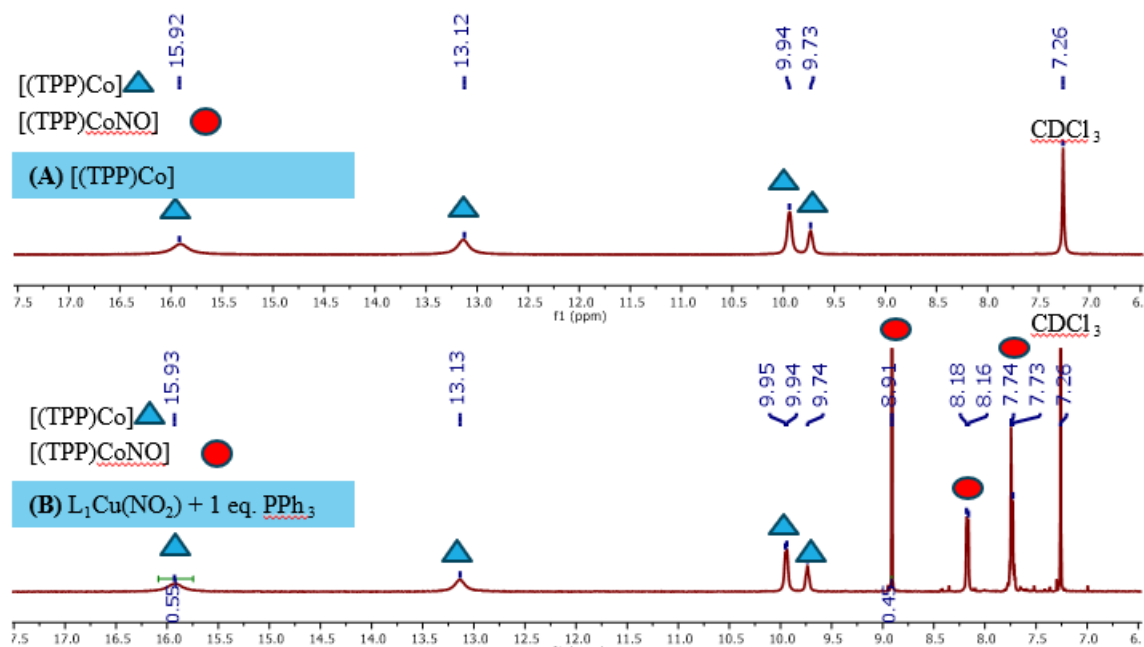

**Figure S4.**  $^1\text{H}$  NMR (400 MHz,  $\text{CDCl}_3$ , 298 K) spectra of  $[(\text{TPP})\text{Co}^{\text{II}}]$  obtained after the NO-trapping experiment: (A) free  $[(\text{TPP})\text{Co}^{\text{II}}]$ , indicated by blue triangles, and (B)  $[(\text{TPP})\text{CoNO}]$ , indicated by red circles, after one hour of reaction.<sup>2</sup> The  $^1\text{H}$  NMR of  $[(\text{TPP})\text{Co}(\text{NO})]$  (400 MHz,  $\text{CDCl}_3$ ):  $\delta$  8.91 (s, 2H), 8.17 (d,  $J = 8$  Hz, 2H), 7.73 (d,  $J = 4$  Hz, 3H). The  $^1\text{H}$  NMR of  $[(\text{TPP})\text{Co}]$  (400 MHz,  $\text{CDCl}_3$ ):  $\delta$  15.92 (s, 2H), 13.12 (s, 2H), 9.94 (s, 2H), 9.73 (s, 1H). The yield of NO (100%) was calculated from the relative integrals of the proton NMR resonances of  $[(\text{TPP})\text{Co}(\text{NO})]$  and unreacted  $[(\text{TPP})\text{Co}]$  at  $\delta = 15.93$  and  $\delta = 8.91$  ppm, respectively.

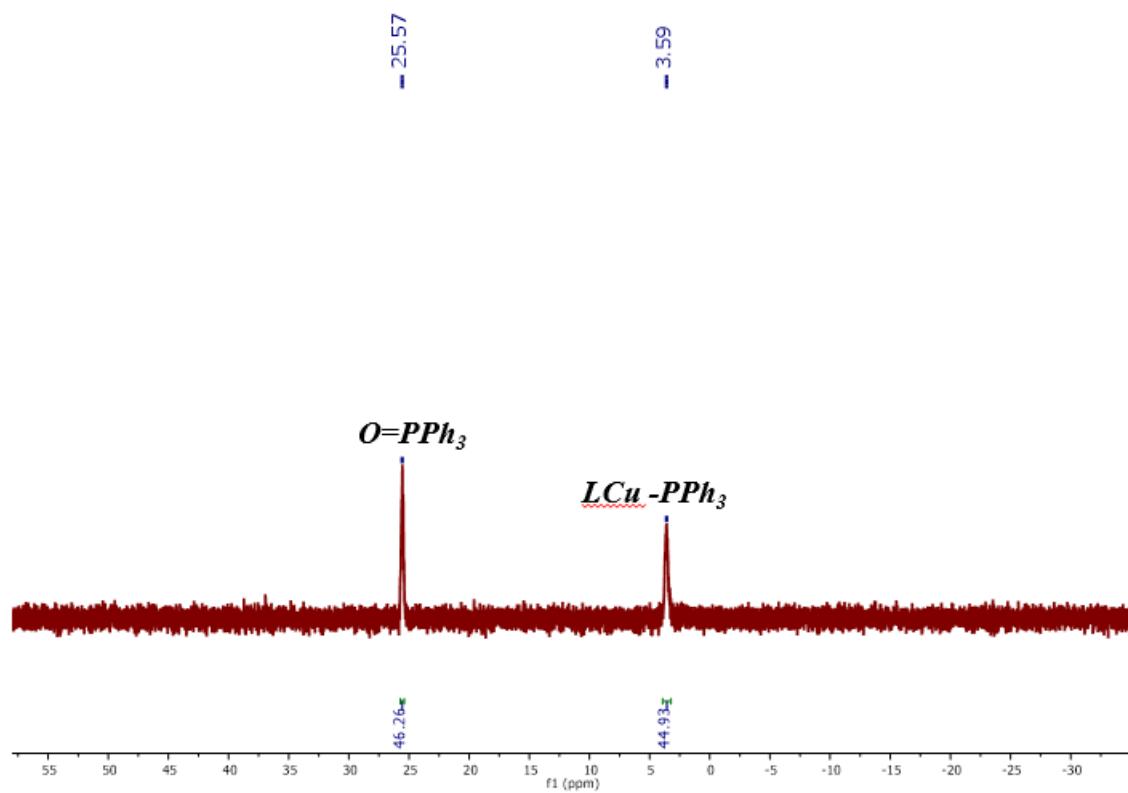

**Figure S5.**  $^{31}\text{P}$  NMR spectrum (400 MHz,  $\text{C}_6\text{D}_6$ ) obtained from 1 equivalent of  $\text{LCu}^{\text{II}}\text{ONO}$  with 1 equivalent of  $\text{PPh}_3$ . The peak at +25.57 ppm is assigned as  $\text{O}=\text{PPh}_3$ , and the peak at +3.59 is assigned as  $\text{LCu}^{\text{I}}\text{PPh}_3$ , according to the reported literature.<sup>1,3</sup>

## Analysis of the remaining unreacted species

Due to the detection of the low amount of phosphine adducts copper complex in this reaction, we explore the UV tracing experiment to predict the remaining amount of unreacted  $\text{LCu}^{\text{II}}\text{ONO}$ . To understand the remaining half the amount of the species, we have plotted the Beer's law plot for the  $\text{LCu}^{\text{II}}\text{ONO}$  in different concentrations, as shown in **Figures S6(A)** and **S6(B)**. We monitored this reaction by UV-Vis spectroscopy by adding 1 equivalent of  $\text{PPh}_3$  (0.045, 0.174 mmol) in 4 mM solution of complex  $\text{LCu}^{\text{II}}(\text{ONO})$  (0.080 g, 0.174 mmol) in DCM forming green spectrum after 1 hr as shown in **Figure S6(A)** which is 51% remains unreacted of  $\text{LCu}^{\text{II}}(\text{ONO})$ .

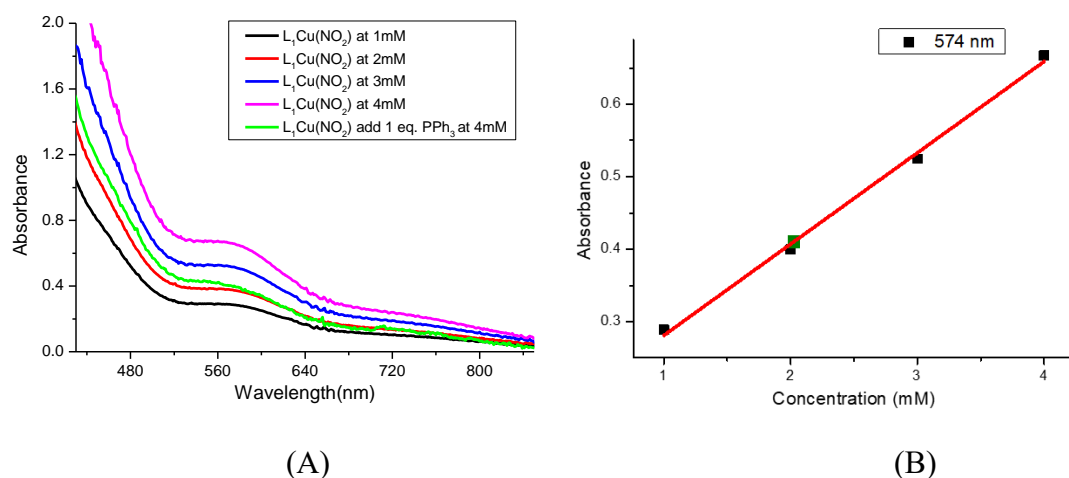

**Figure S6:** (A) UV-Vis spectra of  $\text{LCu}^{\text{II}}\text{ONO}$  in DCM at 25 °C at different concentrations, along with the spectra obtained after the reaction, indicated by the green line. (B) The calibration curve from Beer's plot for  $\text{LCu}^{\text{II}}\text{ONO}$  at 574 nm, along with a green dot indicating that 51% of  $\text{LCu}^{\text{II}}\text{ONO}$  remains unreacted.

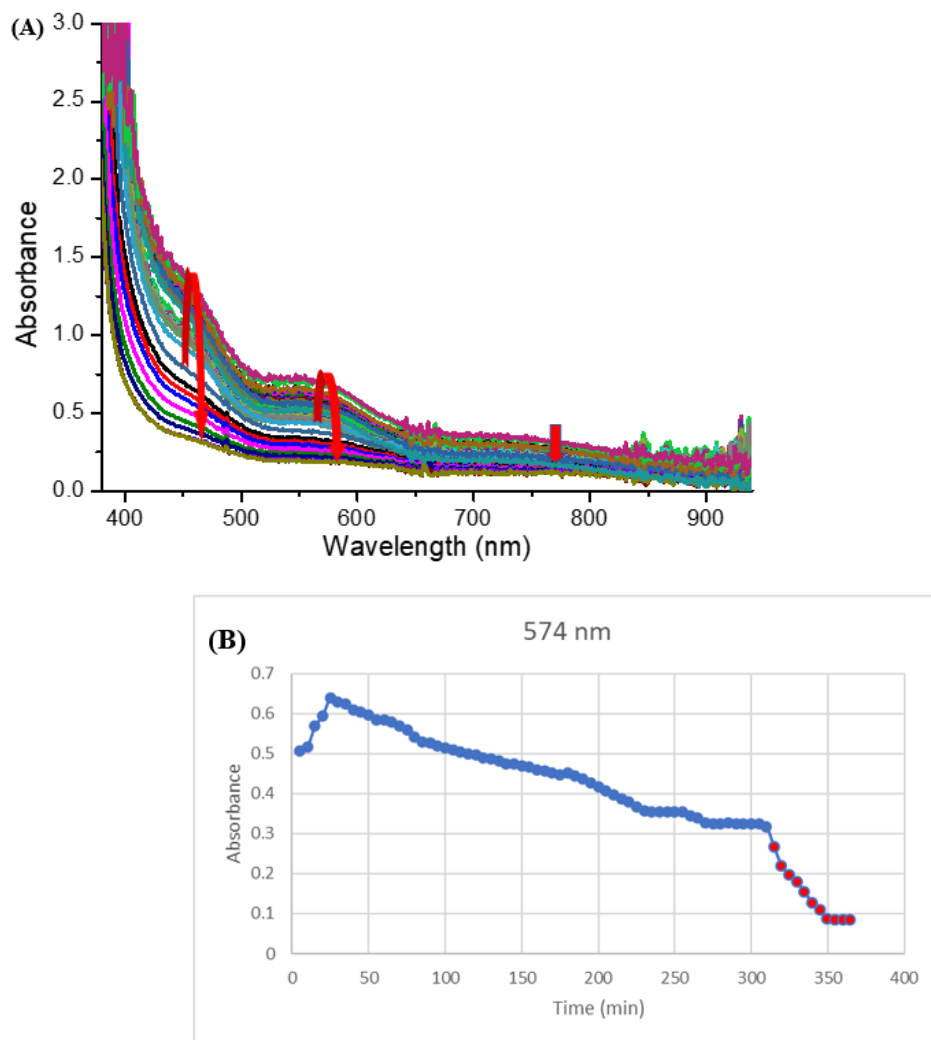

**Figure S7:** (A) UV-Vis spectra of LCu<sup>II</sup>ONO (2 mM) with two equivalents of PPh<sub>3</sub> at different time intervals at low temperature and room temperature. (B) Time trace plot of time (min) vs. absorbance at -40 °C (blue dots) and at room temperature (red dots). Red dotted line: absorbance at room temperature.



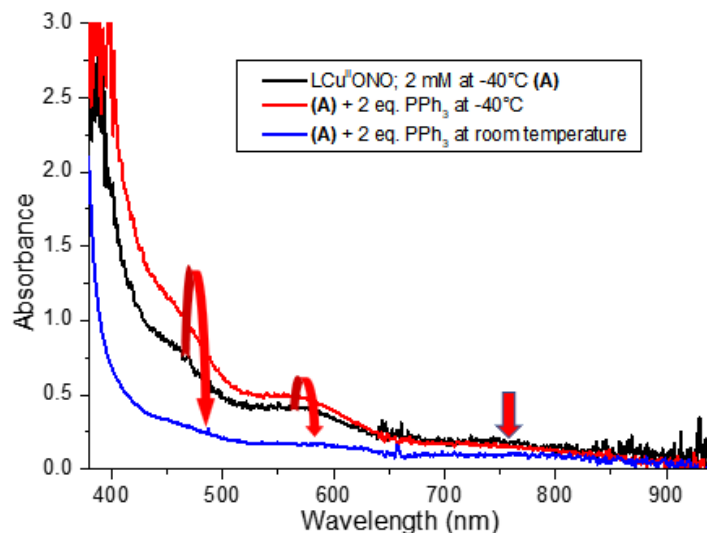

**Figure S8:** UV-Vis spectra of LCu<sup>II</sup>ONO at -40 °C (black); after the addition of two equivalents of PPh<sub>3</sub> to LCu<sup>II</sup>ONO at -40 °C (red) in 25 minutes; and the spectrum recorded after 365 minutes as the temperature returned to room temperature (blue).

## References

- (1) Chand, K.; Chu, Y.-C.; Wang, T.-W.; Kao, C.-L.; Lin, Y.-F.; Tsai, M.-L.; Hsu, S. C. N. Nitric oxide generation study of unsymmetrical  $\beta$ -diketiminato copper(ii) nitrite complexes. *Dalton Trans.* **2022**, *51*, 3485-3496.
- (2) Anju, B. S.; Nair, N. R.; Kundu, S. Nitrite and Nitric Oxide Interconversion at Mononuclear Copper (II): Insight into the Role of the Red Copper Site in Denitrification. *Angew. Chem. Int. Ed.* **2023**, *62*, e202311523 and the supporting information therein.
- (3) Sakhaei, Z.; Kundu, S.; Donnelly, J. M.; Bertke, J. A.; Kim, W. Y.; Warren, T. H. Nitric oxide release via oxygen atom transfer from nitrite at copper(ii). *Chem. Commun.* **2017**, *53*, 549-552.

**The coordinates of optimized structures.**

**Table S1.**

Structure: **1-Cry**, Energy= -2904.961074 Hartree, Charge= 0, Multiplicity=2

The number of the imaginary frequencies: 0

---

| Center | Coordinates (Angstroms) |             |             |
|--------|-------------------------|-------------|-------------|
| Number | X                       | Y           | Z           |
| C      | -2.01793100             | -0.15895000 | 0.29564800  |
| C      | -2.27871600             | -0.98811900 | 1.40647700  |
| C      | -1.33813400             | -0.98477300 | 2.60400800  |
| H      | -0.90304000             | 0.01602100  | 2.68620100  |
| C      | -0.17450800             | -1.96155200 | 2.35005800  |
| H      | -0.54525600             | -2.98892700 | 2.25696200  |
| H      | 0.55177800              | -1.92849700 | 3.17080900  |
| H      | 0.34749200              | -1.71142900 | 1.42239800  |
| C      | -2.02883100             | -1.29404700 | 3.93804100  |
| H      | -2.88634100             | -0.63315900 | 4.10681700  |
| H      | -1.32293900             | -1.15621100 | 4.76453200  |
| H      | -2.38554800             | -2.32912500 | 3.98454700  |
| C      | -3.37596800             | -1.85328800 | 1.34810300  |
| H      | -3.59867500             | -2.49691900 | 2.19306400  |
| C      | -4.19051500             | -1.90149200 | 0.21866600  |
| H      | -5.04499700             | -2.57228500 | 0.19255400  |
| C      | -3.89759400             | -1.10148600 | -0.88333000 |
| H      | -4.52374200             | -1.16344100 | -1.76792600 |
| C      | -2.80235500             | -0.23108300 | -0.87380700 |

---

|   |             |             |             |
|---|-------------|-------------|-------------|
| C | -2.45745700 | 0.60869700  | -2.09656500 |
| H | -1.39125900 | 0.84202400  | -2.03202000 |
| C | -2.67971300 | -0.14711600 | -3.41484700 |
| H | -3.74459600 | -0.30484300 | -3.62149400 |
| H | -2.18550400 | -1.12310900 | -3.40146500 |
| H | -2.26719100 | 0.43260000  | -4.24807700 |
| C | -3.22200500 | 1.94452700  | -2.11488700 |
| H | -2.98242100 | 2.50776600  | -3.02460900 |
| H | -2.96334800 | 2.57132600  | -1.25730000 |
| H | -4.30526500 | 1.77334200  | -2.09791400 |
| C | -2.43643400 | 2.30770700  | 1.47287900  |
| H | -3.26767700 | 1.99669900  | 0.83768600  |
| H | -2.50587200 | 3.38225400  | 1.65354000  |
| H | -2.56188600 | 1.79248800  | 2.43298000  |
| C | -1.09098000 | 1.94894300  | 0.87193200  |
| C | -0.08282800 | 2.92255300  | 0.96984200  |
| H | -0.38057000 | 3.88006800  | 1.37807300  |
| C | 1.28198200  | 2.76927800  | 0.67984600  |
| C | 2.18934500  | 3.94857400  | 0.95862800  |
| H | 2.80979600  | 4.18502200  | 0.08716100  |
| H | 2.86974500  | 3.73414300  | 1.79198800  |
| H | 1.60678500  | 4.83369100  | 1.21948000  |
| C | 3.23003400  | 1.49416300  | 0.06246000  |
| H | 3.78280800  | 1.93745800  | 0.89982400  |
| H | 3.59194200  | 1.99834400  | -0.84781000 |
| C | 3.59655000  | 0.03336600  | -0.02563900 |
| C | 4.91665800  | -0.41178100 | 0.04041000  |
| H | 5.72168900  | 0.30528600  | 0.16308700  |
| C | 5.17481800  | -1.77573300 | -0.04761200 |

|    |             |             |             |
|----|-------------|-------------|-------------|
| H  | 6.19409600  | -2.14461800 | 0.00711300  |
| C  | 4.10657200  | -2.66278400 | -0.20329400 |
| H  | 4.26538600  | -3.73275100 | -0.27414500 |
| C  | 2.82124900  | -2.14647800 | -0.27099300 |
| H  | 1.95052400  | -2.77649200 | -0.40755500 |
| Cu | 0.78678600  | 0.07840100  | -0.30310900 |
| N  | 0.32591500  | -1.38553100 | -2.50022300 |
| N  | -0.90699300 | 0.73966800  | 0.34027000  |
| N  | 1.79007800  | 1.63643400  | 0.20827700  |
| N  | 2.57540600  | -0.82687600 | -0.17831600 |
| O  | 0.05518900  | -1.51899200 | -1.24697000 |
| O  | 0.85024200  | -0.29973200 | -2.78977900 |

---

**Table S2.**

Structure: **1a**, Energy= -2904.958163 Hartree, Charge= 0, Multiplicity=2

The number of the imaginary frequencies: 0

---

| Center | Coordinates (Angstroms) |             |            |
|--------|-------------------------|-------------|------------|
| Number | X                       | Y           | Z          |
| C      | -1.94545000             | -0.08035000 | 0.38830800 |
| C      | -2.02759300             | -0.77647800 | 1.61328300 |
| C      | -0.94187600             | -0.62009900 | 2.66825400 |
| H      | -0.42152900             | 0.32259300  | 2.47691700 |
| C      | 0.09035500              | -1.75247700 | 2.51183200 |
| H      | -0.36260100             | -2.72233000 | 2.74914500 |
| H      | 0.94695800              | -1.59921400 | 3.17889300 |
| H      | 0.45437900              | -1.80624600 | 1.48191200 |

|   |             |             |             |
|---|-------------|-------------|-------------|
| C | -1.48312700 | -0.55840500 | 4.10283500  |
| H | -2.23467600 | 0.23175700  | 4.21044200  |
| H | -0.66660300 | -0.35074300 | 4.80362600  |
| H | -1.94292200 | -1.50471600 | 4.40886600  |
| C | -3.08836400 | -1.66559700 | 1.80765400  |
| H | -3.16634100 | -2.21067600 | 2.74340700  |
| C | -4.04614000 | -1.86468600 | 0.81590300  |
| H | -4.87080200 | -2.55183300 | 0.98445400  |
| C | -3.93490900 | -1.19180400 | -0.39763500 |
| H | -4.67563500 | -1.36516800 | -1.17235900 |
| C | -2.88129900 | -0.30360200 | -0.64285900 |
| C | -2.76717600 | 0.38974600  | -1.99477400 |
| H | -1.75248000 | 0.78931900  | -2.07242800 |
| C | -2.96573600 | -0.58922800 | -3.16387600 |
| H | -3.99538800 | -0.96208100 | -3.21003400 |
| H | -2.28740900 | -1.44205200 | -3.08269600 |
| H | -2.75904300 | -0.08007200 | -4.11228000 |
| C | -3.74915700 | 1.56884000  | -2.11907100 |
| H | -3.66390700 | 2.03278900  | -3.10881600 |
| H | -3.55591900 | 2.34197200  | -1.36997100 |
| H | -4.78405300 | 1.22794600  | -1.99424000 |
| C | -2.32287300 | 2.53186100  | 1.21594900  |
| H | -3.19666400 | 2.11304400  | 0.71549200  |
| H | -2.40595900 | 3.62035800  | 1.23564000  |
| H | -2.34845600 | 2.17049000  | 2.25166100  |
| C | -1.02226800 | 2.10224000  | 0.56680400  |
| C | -0.01833700 | 3.08285800  | 0.47801700  |
| H | -0.30812000 | 4.08738300  | 0.75954100  |
| C | 1.34107800  | 2.89031200  | 0.18956200  |

|    |             |             |             |
|----|-------------|-------------|-------------|
| C  | 2.25718800  | 4.08926600  | 0.30532600  |
| H  | 2.87953800  | 4.19923600  | -0.58958500 |
| H  | 2.93625600  | 3.98386800  | 1.16047900  |
| H  | 1.68241000  | 5.00655400  | 0.44363900  |
| C  | 3.27964900  | 1.52186200  | -0.22897900 |
| H  | 3.81699900  | 2.02147700  | 0.58730700  |
| H  | 3.68009600  | 1.94338000  | -1.16463000 |
| C  | 3.61984000  | 0.05213100  | -0.18508100 |
| C  | 4.93367200  | -0.40386100 | -0.07878000 |
| H  | 5.74858800  | 0.31063800  | -0.02652600 |
| C  | 5.17380200  | -1.77302300 | -0.03632000 |
| H  | 6.18834700  | -2.14832100 | 0.05160700  |
| C  | 4.09371800  | -2.65664100 | -0.10561300 |
| H  | 4.23777300  | -3.73053200 | -0.07486900 |
| C  | 2.81516700  | -2.13309000 | -0.21981300 |
| H  | 1.93628500  | -2.76361800 | -0.29221400 |
| Cu | 0.81263200  | 0.11112900  | -0.44395000 |
| N  | -0.86147100 | 0.83327700  | 0.18862300  |
| N  | 1.84055300  | 1.70256500  | -0.13624300 |
| N  | 2.58613600  | -0.80617200 | -0.25216400 |
| N  | 0.11026900  | -1.34476400 | -1.54879600 |
| O  | 0.15941200  | -1.11469900 | -2.77368200 |
| O  | -0.27936600 | -2.44898300 | -1.13579900 |

---

**Table S3.**

Structure: **1b**, Energy= -2904.95591 Hartree, Charge= 0, Multiplicity=2

The number of the imaginary frequencies: 0

---

| Center<br>Number | Coordinates (Angstroms) |             |             |
|------------------|-------------------------|-------------|-------------|
|                  | X                       | Y           | Z           |
| C                | -2.00326800             | 0.04042000  | 0.31356500  |
| C                | -2.29062500             | -0.28678500 | 1.65448100  |
| C                | -1.36589600             | 0.17705100  | 2.77173300  |
| H                | -0.92038000             | 1.12873900  | 2.46557600  |
| C                | -0.21116400             | -0.82923400 | 2.93704200  |
| H                | -0.59382900             | -1.80853200 | 3.24677300  |
| H                | 0.50598800              | -0.48310700 | 3.69072600  |
| H                | 0.32417800              | -0.96786800 | 1.99354300  |
| C                | -2.07697300             | 0.41528700  | 4.10960500  |
| H                | -2.92834300             | 1.09527600  | 3.99414900  |
| H                | -1.37992100             | 0.85915800  | 4.82895100  |
| H                | -2.44687600             | -0.51793600 | 4.54893300  |
| C                | -3.39824200             | -1.09885800 | 1.91788100  |
| H                | -3.64269800             | -1.35912900 | 2.94270200  |
| C                | -4.19405300             | -1.58129200 | 0.88113600  |
| H                | -5.05634100             | -2.20440100 | 1.10234200  |
| C                | -3.87209200             | -1.28051000 | -0.44036700 |
| H                | -4.48227300             | -1.68512700 | -1.24135600 |
| C                | -2.76735700             | -0.48050800 | -0.75127200 |
| C                | -2.38403400             | -0.19367100 | -2.19699300 |
| H                | -1.30205500             | -0.02760400 | -2.20554600 |
| C                | -2.67731400             | -1.37330200 | -3.13583300 |
| H                | -3.75384900             | -1.51882200 | -3.28299600 |
| H                | -2.25148500             | -2.30411700 | -2.75162800 |
| H                | -2.23882000             | -1.17840400 | -4.12102300 |
| C                | -3.05016900             | 1.08581100  | -2.73494400 |

|    |             |             |             |
|----|-------------|-------------|-------------|
| H  | -2.78857100 | 1.23499500  | -3.78923600 |
| H  | -2.73034300 | 1.97396400  | -2.18438500 |
| H  | -4.14232500 | 1.01421700  | -2.66438100 |
| C  | -2.40769100 | 2.77569600  | 0.42292900  |
| H  | -3.23794800 | 2.24282600  | -0.04377900 |
| H  | -2.46938800 | 3.83414000  | 0.16234500  |
| H  | -2.54160500 | 2.68346900  | 1.50756800  |
| C  | -1.06217700 | 2.20065700  | 0.02459500  |
| C  | -0.04816600 | 3.12666600  | -0.27353800 |
| H  | -0.34075100 | 4.16894500  | -0.28385800 |
| C  | 1.31325900  | 2.86342800  | -0.48345500 |
| C  | 2.22467300  | 4.05087600  | -0.70698800 |
| H  | 2.84273900  | 3.91268600  | -1.60092400 |
| H  | 2.90759000  | 4.18859600  | 0.14041200  |
| H  | 1.64550500  | 4.96819500  | -0.82448800 |
| C  | 3.26076100  | 1.45003200  | -0.53017400 |
| H  | 3.80140500  | 2.17501800  | 0.09108800  |
| H  | 3.63649400  | 1.58369500  | -1.55676000 |
| C  | 3.62816600  | 0.06436200  | -0.06165700 |
| C  | 4.94962600  | -0.33459500 | 0.13827100  |
| H  | 5.75860100  | 0.36335600  | -0.05073100 |
| C  | 5.20366900  | -1.62715200 | 0.58479200  |
| H  | 6.22390600  | -1.95728000 | 0.75241100  |
| C  | 4.13097300  | -2.49209200 | 0.81798100  |
| H  | 4.28743800  | -3.50547400 | 1.16950800  |
| C  | 2.84483800  | -2.03009700 | 0.58430200  |
| H  | 1.97001100  | -2.65244800 | 0.72893400  |
| Cu | 0.81386900  | 0.01134600  | -0.26051100 |
| N  | -0.88243000 | 0.87944800  | 0.02399600  |



|   |            |             |             |
|---|------------|-------------|-------------|
| N | 1.81861100 | 1.63319900  | -0.46237400 |
| N | 2.60393300 | -0.77679900 | 0.15796000  |
| O | 0.06964600 | -1.76677900 | -0.55222900 |
| N | 0.47759400 | -2.12700600 | -1.74727500 |
| O | 0.11176400 | -3.24151900 | -2.08759900 |

---

**Table S4.**

Structure: **2a**, Energy= -2829.707678 Hartree, Charge= 0, Multiplicity=2

The number of the imaginary frequencies: 0

---

| Center | Coordinates (Angstroms) |             |             |
|--------|-------------------------|-------------|-------------|
| Number | X                       | Y           | Z           |
| C      | -1.95348500             | -0.18931900 | 0.25469700  |
| C      | -2.04966700             | -1.25606500 | 1.17410900  |
| C      | -1.04034300             | -1.39714900 | 2.30510600  |
| H      | -0.58670900             | -0.41443300 | 2.46540300  |
| C      | 0.09077400              | -2.35876700 | 1.90151100  |
| H      | -0.30302600             | -3.36359100 | 1.70941100  |
| H      | 0.84442800              | -2.42953000 | 2.69509300  |
| H      | 0.58485300              | -2.01476600 | 0.98998500  |
| C      | -1.67800000             | -1.82769500 | 3.63378600  |
| H      | -2.50362800             | -1.16338100 | 3.91259000  |
| H      | -0.93075100             | -1.79940000 | 4.43500800  |
| H      | -2.06915200             | -2.85035500 | 3.58907100  |
| C      | -3.07106800             | -2.19655300 | 1.00806300  |
| H      | -3.15278300             | -3.02671900 | 1.70325400  |
| C      | -3.98663000             | -2.08524500 | -0.03592600 |

|   |             |             |             |
|---|-------------|-------------|-------------|
| H | -4.77373300 | -2.82520700 | -0.15317700 |
| C | -3.89057800 | -1.01826500 | -0.92498400 |
| H | -4.60888800 | -0.93186900 | -1.73586700 |
| C | -2.88251900 | -0.05594900 | -0.79983700 |
| C | -2.81430700 | 1.09153800  | -1.79891800 |
| H | -1.99559800 | 1.75015900  | -1.49627200 |
| C | -2.50083700 | 0.58766100  | -3.21845500 |
| H | -3.29417500 | -0.07528100 | -3.58447100 |
| H | -1.55913200 | 0.03321200  | -3.22799700 |
| H | -2.42269900 | 1.43167900  | -3.91461700 |
| C | -4.11021100 | 1.92255600  | -1.80713900 |
| H | -4.00658300 | 2.78105900  | -2.48087100 |
| H | -4.35943400 | 2.30310300  | -0.81094900 |
| H | -4.96143400 | 1.32706000  | -2.15687600 |
| C | -2.34394500 | 2.15853300  | 1.66036500  |
| H | -3.15994700 | 2.14527500  | 0.93366400  |
| H | -2.33230100 | 3.13100800  | 2.15585300  |
| H | -2.57589300 | 1.38902300  | 2.40533100  |
| C | -1.00934500 | 1.86606600  | 1.00370300  |
| C | -0.00820600 | 2.84053500  | 1.15801900  |
| H | -0.30259600 | 3.74139500  | 1.68185800  |
| C | 1.34741100  | 2.75682300  | 0.79126100  |
| C | 2.24871200  | 3.90785400  | 1.18635400  |
| H | 2.83945000  | 4.25862500  | 0.33275100  |
| H | 2.95821700  | 3.60155600  | 1.96528300  |
| H | 1.66699300  | 4.74613100  | 1.57413500  |
| C | 3.27704200  | 1.57377200  | -0.02652500 |
| H | 3.84564200  | 1.90388600  | 0.85281400  |
| H | 3.64159000  | 2.18151400  | -0.87087700 |

|    |             |             |             |
|----|-------------|-------------|-------------|
| C  | 3.63074400  | 0.12865700  | -0.29758200 |
| C  | 4.95432300  | -0.31001200 | -0.34473800 |
| H  | 5.76071100  | 0.39783500  | -0.18247000 |
| C  | 5.21637400  | -1.65258700 | -0.59540700 |
| H  | 6.23913500  | -2.01449300 | -0.62928700 |
| C  | 4.14580400  | -2.52582300 | -0.80256800 |
| H  | 4.30503100  | -3.57918600 | -1.00376600 |
| C  | 2.85646900  | -2.01736400 | -0.75319500 |
| H  | 1.98370700  | -2.63703100 | -0.92907900 |
| Cu | 0.81789900  | 0.17290700  | -0.44671500 |
| N  | -0.84733600 | 0.70861500  | 0.35761600  |
| N  | 1.84394300  | 1.70594500  | 0.15348300  |
| N  | 2.60526300  | -0.72070600 | -0.49532200 |
| N  | 0.07054600  | -0.99864400 | -1.74570300 |
| O  | -0.12319800 | -2.19914000 | -1.61960700 |

---

**Table S5.**

Structure: **2b**, Energy= -2829.69101 Hartree, Charge= 0, Multiplicity=2

The number of the imaginary frequencies: 0

---

| Center | Coordinates (Angstroms) |             |            |
|--------|-------------------------|-------------|------------|
| Number | X                       | Y           | Z          |
| C      | -1.95624200             | -0.18506600 | 0.24753300 |
| C      | -2.05654000             | -1.23541300 | 1.18514600 |
| C      | -1.05345900             | -1.35593900 | 2.32420700 |
| H      | -0.60783300             | -0.36810900 | 2.47619200 |
| C      | 0.08649100              | -2.31491100 | 1.93952000 |

|   |             |             |             |
|---|-------------|-------------|-------------|
| H | -0.29851200 | -3.32518200 | 1.76019400  |
| H | 0.83880700  | -2.36696500 | 2.73574600  |
| H | 0.58064100  | -1.98326900 | 1.02282500  |
| C | -1.69543000 | -1.77537500 | 3.65431100  |
| H | -2.52822200 | -1.11467500 | 3.91982900  |
| H | -0.95310000 | -1.73053100 | 4.45928100  |
| H | -2.07730500 | -2.80187800 | 3.62018900  |
| C | -3.07857400 | -2.17744800 | 1.03157300  |
| H | -3.16447700 | -2.99510800 | 1.74075000  |
| C | -3.98918800 | -2.08306600 | -0.01796800 |
| H | -4.77667800 | -2.82405200 | -0.12558300 |
| C | -3.88771200 | -1.03269400 | -0.92615500 |
| H | -4.60161500 | -0.96092000 | -1.74223800 |
| C | -2.87937100 | -0.06975700 | -0.81344900 |
| C | -2.79858400 | 1.05398200  | -1.83778900 |
| H | -1.99200400 | 1.72698200  | -1.53387600 |
| C | -2.44800900 | 0.51323800  | -3.23504500 |
| H | -3.23337900 | -0.15812200 | -3.60286300 |
| H | -1.50887800 | -0.04358800 | -3.20711400 |
| H | -2.35138900 | 1.33862600  | -3.95091700 |
| C | -4.09931200 | 1.87463400  | -1.89768700 |
| H | -3.98449400 | 2.71773500  | -2.58880000 |
| H | -4.37592300 | 2.27650200  | -0.91712300 |
| H | -4.93769800 | 1.26541100  | -2.25450700 |
| C | -2.37583100 | 2.20080400  | 1.58785600  |
| H | -3.17180700 | 2.19869600  | 0.83886800  |
| H | -2.36376100 | 3.17390700  | 2.08202700  |
| H | -2.63861500 | 1.43523700  | 2.32634000  |
| C | -1.02945300 | 1.88961000  | 0.96672000  |

|    |             |             |             |
|----|-------------|-------------|-------------|
| C  | -0.02564000 | 2.86196400  | 1.11691200  |
| H  | -0.32265800 | 3.77716400  | 1.61355200  |
| C  | 1.33298600  | 2.76099800  | 0.77171500  |
| C  | 2.23439600  | 3.91994000  | 1.14093400  |
| H  | 2.82793900  | 4.24886300  | 0.28055500  |
| H  | 2.94147400  | 3.63204700  | 1.92891900  |
| H  | 1.65226100  | 4.76815600  | 1.50545800  |
| C  | 3.27297500  | 1.56156300  | 0.00622900  |
| H  | 3.82733000  | 1.87631300  | 0.90048500  |
| H  | 3.64640400  | 2.18749200  | -0.82009400 |
| C  | 3.63498500  | 0.12386200  | -0.28621600 |
| C  | 4.96041700  | -0.30522600 | -0.35467900 |
| H  | 5.76468600  | 0.40628900  | -0.19816500 |
| C  | 5.22648400  | -1.64451300 | -0.61924300 |
| H  | 6.25088500  | -1.99967100 | -0.67080700 |
| C  | 4.15865100  | -2.52355800 | -0.81576200 |
| H  | 4.32226000  | -3.57448800 | -1.02591500 |
| C  | 2.86655000  | -2.02471600 | -0.74310700 |
| H  | 1.99269000  | -2.64895300 | -0.90702800 |
| Cu | 0.82327500  | 0.14623000  | -0.38824300 |
| N  | -0.85497600 | 0.72006900  | 0.34767800  |
| N  | 1.83655200  | 1.68954500  | 0.17120900  |
| N  | 2.61276100  | -0.73067300 | -0.47512800 |
| O  | 0.07925700  | -1.04717100 | -1.72689400 |
| N  | -0.13692000 | -2.27643800 | -1.62181200 |

-----

**Table S6.**

Structure: **3a**, Energy= -3941.575485 Hartree, Charge= 0, Multiplicity=2

The number of the imaginary frequencies: 0

---

| Center | Coordinates (Angstroms) |             |             |
|--------|-------------------------|-------------|-------------|
| Number | X                       | Y           | Z           |
| C      | -1.52549100             | -0.38366600 | 1.23069800  |
| C      | -1.38609100             | -1.06900100 | 2.45614900  |
| C      | -0.15268800             | -0.87323900 | 3.32908100  |
| H      | 0.30710900              | 0.07972000  | 3.05533100  |
| C      | 0.88763900              | -1.96981800 | 3.03566200  |
| H      | 0.50353800              | -2.95406200 | 3.33079400  |
| H      | 1.81377800              | -1.78235400 | 3.59284600  |
| H      | 1.11219100              | -2.01469100 | 1.96765400  |
| C      | -0.47555900             | -0.80824400 | 4.82881000  |
| H      | -1.23509100             | -0.04771100 | 5.04329900  |
| H      | 0.42762800              | -0.55796500 | 5.39693100  |
| H      | -0.84464500             | -1.76717900 | 5.20965700  |
| C      | -2.38073900             | -1.97979200 | 2.82418900  |
| H      | -2.29207300             | -2.52141200 | 3.76123100  |
| C      | -3.48098400             | -2.21025500 | 2.00184200  |
| H      | -4.24781200             | -2.91860700 | 2.30405600  |
| C      | -3.59056400             | -1.54221200 | 0.78413600  |
| H      | -4.44196900             | -1.74522600 | 0.14341900  |
| C      | -2.61519800             | -0.62888700 | 0.36915600  |
| C      | -2.71121400             | 0.07617000  | -0.97896300 |
| H      | -1.68799800             | 0.20128800  | -1.34380200 |
| C      | -3.46551400             | -0.74286300 | -2.03192900 |
| H      | -4.53037000             | -0.84027100 | -1.78796400 |
| H      | -3.03584700             | -1.74415200 | -2.12816900 |

|   |             |             |             |
|---|-------------|-------------|-------------|
| H | -3.39328200 | -0.24817400 | -3.00308800 |
| C | -3.32860000 | 1.48089200  | -0.86400600 |
| H | -3.39148000 | 1.94226400  | -1.85644400 |
| H | -2.73177400 | 2.13767200  | -0.22578900 |
| H | -4.34178000 | 1.43042000  | -0.44649900 |
| C | -1.65273100 | 2.15008000  | 2.31090100  |
| H | -2.62103100 | 1.77478900  | 1.97511900  |
| H | -1.70405800 | 3.23653800  | 2.41160600  |
| H | -1.47457100 | 1.72822100  | 3.30679800  |
| C | -0.52918800 | 1.75666200  | 1.36866600  |
| C | 0.46805100  | 2.72372500  | 1.16782500  |
| H | 0.29063500  | 3.69624600  | 1.60897100  |
| C | 1.69910800  | 2.55182000  | 0.51748900  |
| C | 2.64066700  | 3.73592100  | 0.48847300  |
| H | 2.95370800  | 3.95571900  | -0.53687300 |
| H | 3.54344500  | 3.54152900  | 1.08037200  |
| H | 2.15484400  | 4.62431900  | 0.89460700  |
| C | 3.36854300  | 1.26382900  | -0.63780400 |
| H | 4.14266700  | 1.81314900  | -0.09100300 |
| H | 3.38342100  | 1.65511500  | -1.66889900 |
| C | 3.75548800  | -0.19150700 | -0.67578700 |
| C | 5.06027800  | -0.60397600 | -0.94321200 |
| H | 5.83337300  | 0.13732800  | -1.11656100 |
| C | 5.34491100  | -1.96469000 | -0.98530100 |
| H | 6.35292700  | -2.30845600 | -1.19451000 |
| C | 4.31699200  | -2.87898000 | -0.74467800 |
| H | 4.49614200  | -3.94809200 | -0.75578700 |
| C | 3.04175100  | -2.39430000 | -0.48956200 |
| H | 2.20330100  | -3.05345800 | -0.29943500 |

|    |             |             |             |
|----|-------------|-------------|-------------|
| Cu | 0.92095000  | -0.14524800 | -0.32758200 |
| N  | -0.51165900 | 0.53709100  | 0.82965700  |
| N  | 2.05164200  | 1.40636700  | -0.04755700 |
| N  | 2.76465300  | -1.07684700 | -0.46691900 |
| N  | 0.04435300  | -1.84443700 | -0.88729900 |
| O  | -0.34450500 | -2.01802100 | -2.05543600 |
| O  | -0.00269800 | -2.79415400 | -0.08106300 |
| P  | 0.64417800  | 0.84297100  | -3.03296700 |
| C  | -0.84001800 | 0.74650400  | -4.13057600 |
| C  | -1.11294100 | -0.49415700 | -4.73080600 |
| C  | -1.71111600 | 1.81646000  | -4.36989900 |
| C  | -2.22116300 | -0.65376800 | -5.55882200 |
| H  | -0.45568400 | -1.33574400 | -4.54322100 |
| C  | -2.82934600 | 1.65093300  | -5.19167000 |
| H  | -1.51767300 | 2.78759000  | -3.92873300 |
| C  | -3.08723800 | 0.41833600  | -5.79112200 |
| H  | -2.41367500 | -1.61949000 | -6.01792000 |
| H  | -3.49257200 | 2.49338900  | -5.36813800 |
| H  | -3.95445900 | 0.29235100  | -6.43298700 |
| C  | 0.92558100  | 2.65596900  | -2.89015200 |
| C  | 1.99262900  | 3.35296000  | -3.47355900 |
| C  | 0.03563700  | 3.36153900  | -2.06241000 |
| C  | 2.14501500  | 4.72565300  | -3.26124500 |
| H  | 2.70748100  | 2.82929600  | -4.09835200 |
| C  | 0.17679100  | 4.73336500  | -1.86567000 |
| H  | -0.76116300 | 2.82884900  | -1.55299600 |
| C  | 1.23196800  | 5.42196200  | -2.46821300 |
| H  | 2.97758100  | 5.24992500  | -3.72215300 |
| H  | -0.52524100 | 5.25838300  | -1.22458700 |



|   |            |             |             |
|---|------------|-------------|-------------|
| H | 1.34952800 | 6.48985800  | -2.30862400 |
| C | 1.92562800 | 0.27252700  | -4.22648100 |
| C | 2.77194200 | -0.78050200 | -3.85936500 |
| C | 2.05001000 | 0.82351800  | -5.51348900 |
| C | 3.74838200 | -1.25175200 | -4.74043000 |
| H | 2.65170500 | -1.25130300 | -2.89305000 |
| C | 3.02527700 | 0.35750200  | -6.39210700 |
| H | 1.37567400 | 1.61496000  | -5.82645000 |
| C | 3.88209300 | -0.67812200 | -6.00392700 |
| H | 4.39623200 | -2.06872600 | -4.43629800 |
| H | 3.11469000 | 0.79565700  | -7.38214200 |
| H | 4.64088600 | -1.04155500 | -6.69101500 |

---

**Table S7.**

Structure: **4a**, Energy= -4978.185758 Hartree, Charge= 0, Multiplicity=2

The number of the imaginary frequencies: 0

-----

| Center | Coordinates (Angstroms) |             |            |
|--------|-------------------------|-------------|------------|
| Number | X                       | Y           | Z          |
| C      | -2.21801300             | 0.93843400  | 1.55424200 |
| C      | -2.17621800             | 0.70892500  | 2.94550300 |
| C      | -1.16741300             | 1.41906300  | 3.83959800 |
| H      | -0.75068500             | 2.25899400  | 3.27818600 |
| C      | 0.00580600              | 0.48433900  | 4.18530200 |
| H      | -0.34326600             | -0.37048000 | 4.77763100 |
| H      | 0.76185400              | 1.01910900  | 4.77342800 |
| H      | 0.46668800              | 0.08817300  | 3.27734400 |

-----

|   |             |             |             |
|---|-------------|-------------|-------------|
| C | -1.80467900 | 1.99020700  | 5.11613100  |
| H | -2.65674100 | 2.63972200  | 4.88582700  |
| H | -1.06810900 | 2.57903500  | 5.67479000  |
| H | -2.16156200 | 1.19601000  | 5.78156100  |
| C | -3.05399800 | -0.23267200 | 3.49143400  |
| H | -3.02984700 | -0.43012700 | 4.55931400  |
| C | -3.94922700 | -0.93014500 | 2.68550500  |
| H | -4.62501200 | -1.65914500 | 3.12483200  |
| C | -3.97040800 | -0.69931400 | 1.31145800  |
| H | -4.66233700 | -1.25917500 | 0.69193800  |
| C | -3.10577900 | 0.22703000  | 0.71807100  |
| C | -3.10824600 | 0.45353600  | -0.78959000 |
| H | -2.07004800 | 0.63373800  | -1.08407600 |
| C | -3.59123900 | -0.76652100 | -1.58042600 |
| H | -4.65671100 | -0.96538500 | -1.41176300 |
| H | -3.01870000 | -1.65775200 | -1.31021300 |
| H | -3.45446800 | -0.58774400 | -2.64899600 |
| C | -3.92619700 | 1.69235200  | -1.19571400 |
| H | -3.90953900 | 1.80856900  | -2.28593000 |
| H | -3.52931900 | 2.61036400  | -0.75540900 |
| H | -4.97183100 | 1.58967100  | -0.88052500 |
| C | -2.86300900 | 3.62098900  | 1.68366000  |
| H | -3.70091300 | 2.96719700  | 1.43705100  |
| H | -3.09868400 | 4.64053700  | 1.37006700  |
| H | -2.76602000 | 3.62047500  | 2.77527600  |
| C | -1.56520000 | 3.15733300  | 1.04746600  |
| C | -0.70029300 | 4.17331500  | 0.61500300  |

|    |             |             |             |
|----|-------------|-------------|-------------|
| H  | -1.08253700 | 5.18473000  | 0.66717400  |
| C  | 0.62181200  | 4.03109600  | 0.17112800  |
| C  | 1.36231900  | 5.29225800  | -0.21583700 |
| H  | 1.76507500  | 5.20475900  | -1.23006600 |
| H  | 2.20235800  | 5.48810400  | 0.46148400  |
| H  | 0.69545400  | 6.15519700  | -0.18739300 |
| C  | 2.61969200  | 2.79653800  | -0.30773400 |
| H  | 3.21912600  | 3.60242300  | 0.13061800  |
| H  | 2.72221100  | 2.89623900  | -1.40196400 |
| C  | 3.22183600  | 1.47807300  | 0.09748900  |
| C  | 4.59708700  | 1.24841600  | 0.05411100  |
| H  | 5.26684900  | 2.05370700  | -0.22900400 |
| C  | 5.08211600  | -0.02099600 | 0.35483800  |
| H  | 6.14755400  | -0.22456200 | 0.31489600  |
| C  | 4.17733100  | -1.02449300 | 0.70711700  |
| H  | 4.50393500  | -2.03170100 | 0.94195900  |
| C  | 2.82443500  | -0.71493900 | 0.75433400  |
| H  | 2.08708700  | -1.45798100 | 1.02598200  |
| Cu | 0.39557600  | 1.11286900  | 0.28238600  |
| N  | -1.28914300 | 1.85441900  | 0.96987700  |
| N  | 1.22551500  | 2.85279500  | 0.08875100  |
| N  | 2.35561800  | 0.50982700  | 0.44769300  |
| N  | -0.18672900 | -0.78635300 | 0.35536700  |
| O  | -0.51149400 | -1.41573400 | -0.66446500 |
| O  | -0.14890700 | -1.37080700 | 1.45482100  |
| P  | 0.49374500  | 0.96939600  | -2.74239500 |
| C  | -0.82122200 | 0.19690300  | -3.78264100 |

|   |             |             |             |
|---|-------------|-------------|-------------|
| C | -0.88581900 | -1.20622500 | -3.78877200 |
| C | -1.73353300 | 0.92170500  | -4.56098700 |
| C | -1.83070300 | -1.86427700 | -4.57300300 |
| H | -0.20346500 | -1.78291000 | -3.17600500 |
| C | -2.69075500 | 0.25821300  | -5.33290100 |
| H | -1.69845400 | 2.00529500  | -4.57280400 |
| C | -2.73858100 | -1.13618200 | -5.34583800 |
| H | -1.85996700 | -2.94905000 | -4.56943300 |
| H | -3.39155600 | 0.83505200  | -5.93050200 |
| H | -3.48015400 | -1.65200700 | -5.94955800 |
| C | 0.32200500  | 2.75805200  | -3.14945500 |
| C | 1.25759300  | 3.49633200  | -3.88737200 |
| C | -0.79363500 | 3.42570500  | -2.61863700 |
| C | 1.06822700  | 4.86328800  | -4.10722800 |
| H | 2.13300400  | 3.00589300  | -4.29861500 |
| C | -0.99204800 | 4.78408400  | -2.85333300 |
| H | -1.50394600 | 2.88072700  | -2.00591600 |
| C | -0.06069600 | 5.50880600  | -3.60069400 |
| H | 1.80304400  | 5.42095900  | -4.68144700 |
| H | -1.86317500 | 5.27853600  | -2.43390100 |
| H | -0.20826000 | 6.57047900  | -3.77652800 |
| C | 1.98753700  | 0.48810100  | -3.71240800 |
| C | 3.15131800  | 0.12519400  | -3.02555300 |
| C | 2.00475200  | 0.49119800  | -5.11624800 |
| C | 4.32027400  | -0.19818800 | -3.71742300 |
| H | 3.13887900  | 0.07326100  | -1.94585800 |
| C | 3.16823900  | 0.16490800  | -5.81087100 |

|   |             |             |             |
|---|-------------|-------------|-------------|
| H | 1.10336400  | 0.75120200  | -5.66285500 |
| C | 4.33217300  | -0.17384800 | -5.11227800 |
| H | 5.21312500  | -0.47605700 | -3.16460500 |
| H | 3.16945600  | 0.17392400  | -6.89721800 |
| H | 5.23841200  | -0.42634700 | -5.65528400 |
| P | 1.50867500  | -4.00615300 | -0.19563000 |
| C | 0.11393200  | -5.10740000 | 0.30529400  |
| C | -1.10219500 | -4.49061800 | 0.64486300  |
| C | 0.20722500  | -6.50582000 | 0.36036700  |
| C | -2.20366500 | -5.26255700 | 1.01627100  |
| H | -1.16987400 | -3.40824400 | 0.62133100  |
| C | -0.89454600 | -7.27412600 | 0.74042900  |
| H | 1.14175700  | -6.99585800 | 0.10569300  |
| C | -2.10349900 | -6.65477900 | 1.06607500  |
| H | -3.13840600 | -4.77224900 | 1.27550200  |
| H | -0.80896400 | -8.35686200 | 0.78032500  |
| H | -2.96018400 | -7.25446000 | 1.36153600  |
| C | 2.97467400  | -5.11408100 | 0.00929300  |
| C | 3.46210100  | -5.97893400 | -0.98173700 |
| C | 3.65309900  | -5.04837700 | 1.23726500  |
| C | 4.59453600  | -6.76113100 | -0.74787300 |
| H | 2.95505400  | -6.03751200 | -1.93963700 |
| C | 4.78033100  | -5.83529500 | 1.47559800  |
| H | 3.29328800  | -4.37318800 | 2.01054200  |
| C | 5.25535600  | -6.69288100 | 0.48065200  |
| H | 4.96036600  | -7.42600000 | -1.52575400 |
| H | 5.29129600  | -5.77355700 | 2.43247800  |

|   |             |             |             |
|---|-------------|-------------|-------------|
| H | 6.13771200  | -7.30070400 | 0.65988300  |
| C | 1.35015000  | -3.99191900 | -2.03309700 |
| C | 2.25451200  | -3.18946800 | -2.74712700 |
| C | 0.38606800  | -4.71735100 | -2.74587000 |
| C | 2.21091700  | -3.12677400 | -4.13846000 |
| H | 2.99495900  | -2.60442600 | -2.20893600 |
| C | 0.34063400  | -4.65372400 | -4.14062200 |
| H | -0.32519300 | -5.33817900 | -2.21163200 |
| C | 1.25187500  | -3.86090100 | -4.83976300 |
| H | 2.91068700  | -2.49070100 | -4.66958900 |
| H | -0.40991300 | -5.22548900 | -4.68013800 |
| H | 1.20753900  | -3.80475100 | -5.92366900 |

---

**Table S8.**

Structure: **5a**, Energy= -3866.326764 Hartree, Charge= 0, Multiplicity=2

The number of the imaginary frequencies: 0

---

| Center | Coordinates (Angstroms) |             |            |
|--------|-------------------------|-------------|------------|
| Number | X                       | Y           | Z          |
| C      | 11.63153700             | -1.83141700 | 5.84510500 |
| C      | 11.63402200             | -3.23544300 | 5.73240500 |
| C      | 11.18458900             | -4.12173300 | 6.88045300 |
| H      | 10.75653800             | -3.47236600 | 7.64394700 |
| C      | 12.39184100             | -4.83655100 | 7.51032400 |
| H      | 12.82768800             | -5.55911400 | 6.80897400 |
| H      | 12.08875700             | -5.37797700 | 8.41342000 |

|   |             |             |            |
|---|-------------|-------------|------------|
| H | 13.16959600 | -4.11769400 | 7.77622600 |
| C | 10.10937700 | -5.14245900 | 6.47761400 |
| H | 9.24206800  | -4.65903700 | 6.01495700 |
| H | 9.76044700  | -5.68601900 | 7.36200700 |
| H | 10.50049300 | -5.87630100 | 5.76283300 |
| C | 12.10882700 | -3.81142300 | 4.54812900 |
| H | 12.10853300 | -4.89367200 | 4.44822600 |
| C | 12.58316300 | -3.02498100 | 3.50216200 |
| H | 12.93977500 | -3.48921000 | 2.58642200 |
| C | 12.61627700 | -1.63839600 | 3.64369800 |
| H | 13.01150300 | -1.02840400 | 2.83674200 |
| C | 12.16174400 | -1.02336900 | 4.81328800 |
| C | 12.23214300 | 0.48689100  | 4.98348100 |
| H | 12.20990400 | 0.67759900  | 6.06012300 |
| C | 13.53600100 | 1.08627900  | 4.43973400 |
| H | 14.40460400 | 0.57210000  | 4.86368400 |
| H | 13.59940700 | 2.14811400  | 4.70521500 |
| H | 13.59768100 | 1.01990400  | 3.34716000 |
| C | 11.00788800 | 1.18451800  | 4.36590900 |
| H | 10.94360400 | 0.97796000  | 3.29047400 |
| H | 11.07475600 | 2.27121900  | 4.49889100 |
| H | 10.07815100 | 0.84569600  | 4.83268400 |
| C | 8.89883100  | -1.48874300 | 6.04348900 |
| H | 8.80495700  | -2.56603600 | 6.21455200 |
| H | 9.27140800  | -1.35957200 | 5.02442600 |
| H | 7.90516300  | -1.04204400 | 6.11538800 |
| C | 9.84248100  | -0.87971100 | 7.06473500 |
| C | 9.24686300  | -0.03292400 | 8.01608900 |
| H | 8.17361800  | 0.08758600  | 7.93655100 |

|    |             |             |             |
|----|-------------|-------------|-------------|
| C  | 9.88657800  | 0.76176800  | 8.98695300  |
| C  | 9.02124500  | 1.71942300  | 9.77802400  |
| H  | 7.97700300  | 1.65618000  | 9.46654100  |
| H  | 9.35781100  | 2.75445400  | 9.64441800  |
| H  | 9.07745600  | 1.49774800  | 10.84973300 |
| C  | 11.77680700 | 1.58145200  | 10.19371500 |
| H  | 11.25438400 | 1.52975200  | 11.15890000 |
| H  | 11.73681400 | 2.63621000  | 9.87769500  |
| C  | 13.21359300 | 1.20988100  | 10.44496900 |
| C  | 13.98238100 | 1.88471700  | 11.39587700 |
| H  | 13.55013700 | 2.72125300  | 11.93508100 |
| C  | 15.27492800 | 1.45056600  | 11.65700700 |
| H  | 15.88371400 | 1.95223900  | 12.40266300 |
| C  | 15.77347000 | 0.35134600  | 10.95153700 |
| H  | 16.77298800 | -0.02937700 | 11.12932400 |
| C  | 14.96550100 | -0.24840500 | 9.99787300  |
| H  | 15.30470000 | -1.08807500 | 9.40360900  |
| Cu | 12.42596700 | -0.59200000 | 8.38480400  |
| N  | 13.91573800 | -1.21372400 | 7.30541400  |
| N  | 11.14252500 | -1.17611800 | 7.01876600  |
| N  | 11.18872400 | 0.69961800  | 9.20583800  |
| N  | 13.71078300 | 0.17424500  | 9.74782100  |
| O  | 14.64198800 | -2.15661400 | 7.61659200  |
| P  | 11.81796700 | -2.50768100 | 10.47922000 |
| C  | 11.33490300 | -1.40460100 | 11.87906500 |
| C  | 10.00643300 | -1.02440500 | 12.11601500 |
| C  | 12.34659300 | -0.82111900 | 12.65875800 |
| C  | 9.69839600  | -0.09015000 | 13.10599200 |
| H  | 9.20353200  | -1.45992100 | 11.53226700 |



|   |             |             |             |
|---|-------------|-------------|-------------|
| C | 12.03849300 | 0.11161300  | 13.64835900 |
| H | 13.38343300 | -1.09553100 | 12.49292900 |
| C | 10.71281000 | 0.48543400  | 13.87466400 |
| H | 8.66135000  | 0.18495000  | 13.27777700 |
| H | 12.83914700 | 0.55159500  | 14.23586000 |
| H | 10.47149500 | 1.21346700  | 14.64359100 |
| C | 13.13260700 | -3.51728000 | 11.27073000 |
| C | 13.02627700 | -4.02058400 | 12.57837700 |
| C | 14.29749200 | -3.77374100 | 10.53547600 |
| C | 14.05911400 | -4.77448400 | 13.13168500 |
| H | 12.13597500 | -3.81306800 | 13.16418100 |
| C | 15.33343800 | -4.52842000 | 11.09176900 |
| H | 14.39715000 | -3.37274200 | 9.53228700  |
| C | 15.21523900 | -5.03078100 | 12.38746400 |
| H | 13.96527700 | -5.16061700 | 14.14277800 |
| H | 16.23243000 | -4.71810400 | 10.51221100 |
| H | 16.02114800 | -5.61612400 | 12.82107800 |
| C | 10.38267500 | -3.65234000 | 10.33790800 |
| C | 9.23499400  | -3.16775000 | 9.68650000  |
| C | 10.40512800 | -4.98942400 | 10.75652500 |
| C | 8.12647600  | -3.99013800 | 9.49204100  |
| H | 9.21469600  | -2.14824100 | 9.31106100  |
| C | 9.29921100  | -5.81624800 | 10.54604100 |
| H | 11.28640900 | -5.39229700 | 11.24299300 |
| C | 8.15493900  | -5.31927200 | 9.92023800  |
| H | 7.24770900  | -3.59527200 | 8.98971200  |
| H | 9.33434700  | -6.85137700 | 10.87433100 |
| H | 7.29667800  | -5.96500000 | 9.75813800  |

---

**Table S9.**Structure: **6a**, Energy= -3866.324476 Hartree, Charge= 0, Multiplicity=2

The number of the imaginary frequencies: 0

---

| Center | Coordinates (Angstroms) |             |            |
|--------|-------------------------|-------------|------------|
| Number | X                       | Y           | Z          |
| C      | 11.91428500             | -2.24238800 | 6.16506400 |
| C      | 11.48783700             | -3.58966900 | 6.28307100 |
| C      | 10.27415400             | -3.94757300 | 7.12902700 |
| H      | 10.16597000             | -3.15861500 | 7.87684800 |
| C      | 10.42858500             | -5.27720000 | 7.88062800 |
| H      | 10.40209200             | -6.13557500 | 7.19916300 |
| H      | 9.60609600              | -5.39471000 | 8.59288700 |
| H      | 11.36771900             | -5.31506400 | 8.43972700 |
| C      | 8.97696500              | -3.96109300 | 6.30144900 |
| H      | 8.78146900              | -2.99145500 | 5.83781200 |
| H      | 8.12267700              | -4.20724100 | 6.94349400 |
| H      | 9.03267700              | -4.71351300 | 5.50528300 |
| C      | 12.21341300             | -4.58619300 | 5.62375800 |
| H      | 11.89398600             | -5.62032900 | 5.70451900 |
| C      | 13.35178100             | -4.27749700 | 4.88194600 |
| H      | 13.90759100             | -5.06478200 | 4.37993200 |
| C      | 13.77307200             | -2.95428900 | 4.79104100 |
| H      | 14.66105400             | -2.71580900 | 4.21246100 |
| C      | 13.07078000             | -1.91903400 | 5.42041900 |
| C      | 13.54685100             | -0.48338500 | 5.25013100 |
| H      | 12.96072500             | 0.14080000  | 5.93016900 |

---

|   |             |             |             |
|---|-------------|-------------|-------------|
| C | 15.03188700 | -0.31239200 | 5.61208000  |
| H | 15.24647600 | -0.69004400 | 6.61348200  |
| H | 15.30562900 | 0.74884800  | 5.57798800  |
| H | 15.67845900 | -0.83955300 | 4.90052600  |
| C | 13.30814200 | 0.01038800  | 3.81048600  |
| H | 13.91159300 | -0.56657400 | 3.09921800  |
| H | 13.59367500 | 1.06467400  | 3.71475000  |
| H | 12.26097100 | -0.08814300 | 3.51334200  |
| C | 9.87927900  | -0.80946800 | 4.81955700  |
| H | 8.79929400  | -0.86701500 | 4.65741200  |
| H | 10.34627700 | -1.70718600 | 4.41504000  |
| H | 10.24545400 | 0.05084400  | 4.24839100  |
| C | 10.18464100 | -0.60390300 | 6.29509100  |
| C | 9.34101500  | 0.31890400  | 6.94376700  |
| H | 8.59128900  | 0.77439500  | 6.30722400  |
| C | 9.32075600  | 0.72765300  | 8.28953600  |
| C | 8.27099300  | 1.76304800  | 8.65261300  |
| H | 7.71835400  | 2.07843900  | 7.76581800  |
| H | 8.74375700  | 2.64351700  | 9.09875500  |
| H | 7.54715100  | 1.36761100  | 9.37528500  |
| C | 10.08006700 | 0.75629600  | 10.57397600 |
| H | 10.24507000 | -0.07157600 | 11.27005300 |
| H | 9.09209400  | 1.16328500  | 10.82046400 |
| C | 11.12630900 | 1.82301400  | 10.85013300 |
| C | 11.79567200 | 1.85639200  | 12.07666400 |
| H | 11.58365200 | 1.10812200  | 12.83135400 |
| C | 12.74687700 | 2.84796900  | 12.30214300 |
| H | 13.29000300 | 2.88229800  | 13.24209600 |
| C | 12.99797300 | 3.77854000  | 11.29501000 |

|    |             |             |             |
|----|-------------|-------------|-------------|
| H  | 13.73483400 | 4.56550200  | 11.41953300 |
| C  | 12.27565100 | 3.66926000  | 10.10653600 |
| H  | 12.44114000 | 4.37736100  | 9.29658100  |
| Cu | 11.69260400 | -0.84674200 | 8.75656800  |
| N  | 13.50177200 | -0.40730400 | 8.58899900  |
| N  | 11.19514700 | -1.23995100 | 6.87950900  |
| N  | 10.14706700 | 0.24643000  | 9.21346200  |
| N  | 11.36082000 | 2.71845600  | 9.87755100  |
| O  | 14.55739400 | -0.88941500 | 8.89247300  |
| P  | 11.97362900 | -2.36831400 | 10.43057300 |
| C  | 12.40707200 | -1.65359500 | 12.05930400 |
| C  | 11.55032300 | -1.71451700 | 13.16537100 |
| C  | 13.64656000 | -1.00416900 | 12.18352100 |
| C  | 11.92928200 | -1.13832000 | 14.38040000 |
| H  | 10.59132900 | -2.21468400 | 13.08226900 |
| C  | 14.02508200 | -0.44189400 | 13.40012400 |
| H  | 14.31426500 | -0.94753300 | 11.32950400 |
| C  | 13.16761900 | -0.50581600 | 14.50197300 |
| H  | 11.25778800 | -1.19204400 | 15.23239100 |
| H  | 14.98744900 | 0.05380800  | 13.48650700 |
| H  | 13.46285800 | -0.06348100 | 15.44884300 |
| C  | 13.30511200 | -3.59489000 | 10.17444400 |
| C  | 13.93925700 | -4.24707700 | 11.24334800 |
| C  | 13.69171100 | -3.89649100 | 8.86232200  |
| C  | 14.92291100 | -5.20403900 | 10.99700300 |
| H  | 13.67158300 | -4.00093400 | 12.26598400 |
| C  | 14.67283900 | -4.85693600 | 8.61741000  |
| H  | 13.22849900 | -3.38136300 | 8.03102100  |
| C  | 15.28835700 | -5.51354100 | 9.68382200  |

|   |             |             |             |
|---|-------------|-------------|-------------|
| H | 15.40572900 | -5.70658000 | 11.83010500 |
| H | 14.95333700 | -5.07993300 | 7.59254600  |
| H | 16.05664600 | -6.25793700 | 9.49553400  |
| C | 10.45870800 | -3.34243700 | 10.75567000 |
| C | 9.22772000  | -2.81503900 | 10.33845900 |
| C | 10.49126900 | -4.58745400 | 11.39914200 |
| C | 8.04757500  | -3.52444700 | 10.56351700 |
| H | 9.19986500  | -1.85924400 | 9.82329900  |
| C | 9.31027600  | -5.29316700 | 11.62338700 |
| H | 11.43891400 | -5.01286100 | 11.71189800 |
| C | 8.08675800  | -4.76386300 | 11.20474700 |
| H | 7.09993400  | -3.11074000 | 10.23129800 |
| H | 9.34575500  | -6.25936700 | 12.11809700 |
| H | 7.16839800  | -5.31831400 | 11.37455800 |

-----

**Table S10.**

Structure:  $[\text{LCu}^{\text{I}}\text{PPh}_3]$ , Energy= -3736.383981 Hartree, Charge= 0, Multiplicity=1

The number of the imaginary frequencies: 0

-----

| Center<br>Number | Coordinates (Angstroms) |             |             |
|------------------|-------------------------|-------------|-------------|
|                  | X                       | Y           | Z           |
| C                | 2.71961000              | -1.25731600 | 0.09740200  |
| C                | 3.72654300              | -0.44691200 | -0.47483900 |
| C                | 3.63675900              | -0.05105200 | -1.94386900 |
| H                | 3.24485800              | -0.91658800 | -2.49069400 |
| C                | 2.62153800              | 1.08931700  | -2.13159300 |
| H                | 2.48678100              | 1.32577000  | -3.19378700 |

-----

|   |             |             |             |
|---|-------------|-------------|-------------|
| H | 2.94276000  | 1.99488500  | -1.60649300 |
| H | 1.65596100  | 0.78719200  | -1.71805700 |
| C | 4.98571000  | 0.31488000  | -2.57315200 |
| H | 4.86434000  | 0.46328700  | -3.65183800 |
| H | 5.73177300  | -0.47279300 | -2.41838200 |
| H | 5.38711000  | 1.24757400  | -2.16005800 |
| C | 4.76960800  | -0.00276000 | 0.34290400  |
| H | 5.54989300  | 0.62414500  | -0.07581500 |
| C | 4.82434100  | -0.34630000 | 1.69249000  |
| H | 5.64260600  | 0.00996500  | 2.31251700  |
| C | 3.83027600  | -1.15351500 | 2.24312400  |
| H | 3.88528000  | -1.42305300 | 3.29303600  |
| C | 2.77162200  | -1.62765000 | 1.46109200  |
| C | 1.65998500  | -2.48293500 | 2.05785900  |
| H | 1.32856800  | -3.17869900 | 1.27871800  |
| C | 2.09742800  | -3.32010300 | 3.26516000  |
| H | 1.28915500  | -3.99870300 | 3.55961100  |
| H | 2.32745700  | -2.69336600 | 4.13449800  |
| H | 2.98425100  | -3.92247800 | 3.03821600  |
| C | 0.45108900  | -1.60046000 | 2.41096700  |
| H | -0.39440600 | -2.19916600 | 2.76906600  |
| H | 0.12746900  | -1.05133900 | 1.52234600  |
| H | 0.70850700  | -0.86823200 | 3.18454500  |
| C | 2.88947700  | -3.64123300 | -1.30801400 |
| H | 3.76465300  | -3.07233700 | -1.63960300 |
| H | 2.79242800  | -4.52975100 | -1.93502600 |
| H | 3.09583500  | -3.96163600 | -0.28038800 |
| C | 1.63418200  | -2.79101700 | -1.36102900 |
| C | 0.55733500  | -3.29109500 | -2.11702000 |

|   |             |             |             |
|---|-------------|-------------|-------------|
| H | 0.74013600  | -4.23889900 | -2.60878300 |
| C | -0.74707400 | -2.77327900 | -2.26663000 |
| C | -1.72419000 | -3.65147200 | -3.03091100 |
| H | -2.58322200 | -3.92226800 | -2.40634500 |
| H | -1.24129400 | -4.57317300 | -3.36006400 |
| H | -2.11697200 | -3.13974500 | -3.91731300 |
| C | -2.54505700 | -1.24962900 | -1.82612600 |
| H | -3.04638000 | -1.61411100 | -2.73199100 |
| H | -2.62750200 | -0.15908700 | -1.86062800 |
| C | -3.34258800 | -1.72605900 | -0.62192500 |
| C | -2.78859300 | -2.54050800 | 0.37053100  |
| H | -1.76080200 | -2.87253300 | 0.28835100  |
| C | -3.57797000 | -2.90685000 | 1.45949900  |
| H | -3.16811100 | -3.53254200 | 2.24730400  |
| C | -4.89436900 | -2.45581200 | 1.52148700  |
| H | -5.54492600 | -2.71252100 | 2.35116700  |
| C | -5.36114400 | -1.65434400 | 0.47877300  |
| H | -6.38457500 | -1.28270000 | 0.48861900  |
| C | -1.45093000 | 2.38656700  | -1.14144400 |
| C | -1.27077000 | 2.07025500  | -2.49523900 |
| H | -0.63317600 | 1.23067700  | -2.75925900 |
| C | -1.92915300 | 2.79868600  | -3.48556900 |
| H | -1.78524900 | 2.54292800  | -4.53120000 |
| C | -2.78112900 | 3.84581400  | -3.12864800 |
| H | -3.30023300 | 4.41053400  | -3.89758700 |
| C | -2.97432600 | 4.16073900  | -1.78087400 |
| H | -3.64228500 | 4.97039400  | -1.50146100 |
| C | -2.31116500 | 3.43633300  | -0.79043400 |
| H | -2.46575100 | 3.68044300  | 0.25601500  |

|    |             |             |             |
|----|-------------|-------------|-------------|
| C  | -1.57834400 | 1.37372500  | 1.56517500  |
| C  | -2.91938000 | 0.98916300  | 1.41316500  |
| H  | -3.32495200 | 0.80444500  | 0.42484200  |
| C  | -3.74341000 | 0.84636900  | 2.52748400  |
| H  | -4.77785000 | 0.54742900  | 2.39256100  |
| C  | -3.23748300 | 1.07710700  | 3.80906700  |
| H  | -3.87860800 | 0.96032600  | 4.67806300  |
| C  | -1.90516700 | 1.46080300  | 3.96693000  |
| H  | -1.50516600 | 1.64788400  | 4.95953000  |
| C  | -1.07909400 | 1.61146700  | 2.85168800  |
| H  | -0.04654700 | 1.91446200  | 2.98626500  |
| C  | 0.87363900  | 2.53034800  | 0.54900300  |
| C  | 0.93891600  | 3.87291000  | 0.15416900  |
| H  | 0.14072000  | 4.30489900  | -0.43904900 |
| C  | 2.03544500  | 4.66040800  | 0.50907900  |
| H  | 2.07777700  | 5.69779300  | 0.18895500  |
| C  | 3.07231600  | 4.11932300  | 1.27145300  |
| H  | 3.92528200  | 4.73362100  | 1.54569000  |
| C  | 3.01366100  | 2.78229000  | 1.66965300  |
| H  | 3.82161800  | 2.34223000  | 2.24473600  |
| C  | 1.92837200  | 1.98951800  | 1.30053800  |
| H  | 1.91830900  | 0.94065800  | 1.57687500  |
| N  | 1.59708400  | -1.64245800 | -0.68460200 |
| N  | -1.13662500 | -1.60244600 | -1.76503200 |
| N  | -4.61367700 | -1.28882900 | -0.56964300 |
| P  | -0.50286900 | 1.40768200  | 0.08075200  |
| Cu | 0.03904900  | -0.51483900 | -0.68167700 |

---



**Table S11.**Structure: **TS-1a**, Energy= -3941.494531 Hartree, Charge= 0, Multiplicity=2The number of the imaginary frequencies: 1,  $\nu = -203.7 \text{ cm}^{-1}$ 

---

| Center | Coordinates (Angstroms) |             |             |
|--------|-------------------------|-------------|-------------|
| Number | X                       | Y           | Z           |
| C      | -2.56590200             | 0.36455700  | -0.42415300 |
| C      | -2.80963200             | -0.25946900 | 0.81897600  |
| C      | -1.77343800             | -0.17587100 | 1.93191900  |
| H      | -1.16567500             | 0.71473200  | 1.74455800  |
| C      | -0.82362600             | -1.38394200 | 1.90143100  |
| H      | -1.37120700             | -2.30538600 | 2.11768600  |
| H      | -0.02618700             | -1.26954800 | 2.64579500  |
| H      | -0.36476900             | -1.49621500 | 0.91648300  |
| C      | -2.39901400             | -0.01718800 | 3.32496400  |
| H      | -3.10077300             | 0.82384800  | 3.35453600  |
| H      | -1.61566200             | 0.16404600  | 4.06976900  |
| H      | -2.94001700             | -0.91873100 | 3.63413600  |
| C      | -4.00423200             | -0.96118800 | 0.99453100  |
| H      | -4.19564700             | -1.47162000 | 1.93345500  |
| C      | -4.95120000             | -1.03142200 | -0.02602100 |
| H      | -5.86836300             | -1.59533200 | 0.12061900  |
| C      | -4.72363900             | -0.36283300 | -1.22575300 |
| H      | -5.47844100             | -0.39454400 | -2.00758200 |
| C      | -3.53595600             | 0.34411500  | -1.44967400 |
| C      | -3.34234400             | 1.09801000  | -2.76017400 |
| H      | -2.36644700             | 1.58961100  | -2.72039300 |

---

|   |             |             |             |
|---|-------------|-------------|-------------|
| C | -3.34248600 | 0.17319300  | -3.98827000 |
| H | -4.31035600 | -0.32820200 | -4.10283200 |
| H | -2.57053200 | -0.59407700 | -3.91385500 |
| H | -3.16668900 | 0.75894400  | -4.89879400 |
| C | -4.41552400 | 2.18920700  | -2.93653400 |
| H | -4.21632700 | 2.77794000  | -3.83962300 |
| H | -4.44823700 | 2.87644300  | -2.08487700 |
| H | -5.41259700 | 1.74554000  | -3.04116500 |
| C | -2.18370500 | 3.06943400  | 0.09860300  |
| H | -3.07989300 | 3.03468400  | -0.52555400 |
| H | -1.87354600 | 4.11049300  | 0.20676000  |
| H | -2.47301100 | 2.68650700  | 1.08374300  |
| C | -1.07043000 | 2.22416400  | -0.48747100 |
| C | 0.13745500  | 2.88424400  | -0.77649400 |
| H | 0.15058000  | 3.95123000  | -0.59182900 |
| C | 1.34459200  | 2.32158000  | -1.22752500 |
| C | 2.52780000  | 3.25321600  | -1.39132200 |
| H | 2.99150400  | 3.13444800  | -2.37695900 |
| H | 3.30172300  | 3.04212600  | -0.64274100 |
| H | 2.22402700  | 4.29509300  | -1.27436700 |
| C | 2.77855000  | 0.46479800  | -1.78184200 |
| H | 3.58377000  | 0.92899700  | -1.19781600 |
| H | 3.04685400  | 0.60673800  | -2.84105900 |
| C | 2.78145200  | -1.01791400 | -1.48114200 |
| C | 3.93847800  | -1.79210100 | -1.55827100 |
| H | 4.87561200  | -1.33012500 | -1.85192700 |
| C | 3.86881800  | -3.14963800 | -1.25798900 |
| H | 4.75822600  | -3.76910200 | -1.31865600 |
| C | 2.64492600  | -3.70235100 | -0.87555600 |

|    |             |             |             |
|----|-------------|-------------|-------------|
| H  | 2.53724200  | -4.75491600 | -0.64401800 |
| C  | 1.53738000  | -2.87111900 | -0.82197800 |
| H  | 0.55923100  | -3.24083000 | -0.54794000 |
| Cu | 0.08396000  | -0.31985900 | -1.32630000 |
| N  | -1.27681900 | 0.92064200  | -0.67342900 |
| N  | 1.47281300  | 1.02605300  | -1.48207000 |
| N  | 1.60263500  | -1.56255400 | -1.12413800 |
| N  | -1.13365800 | -1.61569900 | -2.15173000 |
| O  | -0.70725900 | -2.17161600 | -3.18394500 |
| O  | -1.75079300 | -2.57272700 | -1.19308200 |
| P  | -1.82241800 | -4.26937200 | -1.56076700 |
| C  | -0.53242100 | -5.45407300 | -1.79013800 |
| C  | 0.23656700  | -5.40347200 | -2.99875700 |
| C  | -0.05089900 | -6.30817600 | -0.74866600 |
| C  | 1.36568400  | -6.18579600 | -3.15915000 |
| H  | -0.06913000 | -4.72818500 | -3.79072900 |
| C  | 1.08996300  | -7.07615900 | -0.92932200 |
| H  | -0.60700200 | -6.39801200 | 0.17702000  |
| C  | 1.81672900  | -7.03329000 | -2.13046800 |
| H  | 1.91606200  | -6.13262200 | -4.09547600 |
| H  | 1.41001600  | -7.73755900 | -0.12730700 |
| H  | 2.70925400  | -7.63709000 | -2.26054300 |
| C  | -2.77233500 | -4.67773800 | -0.07535100 |
| C  | -4.15251900 | -4.91633700 | -0.16036200 |
| C  | -2.15767200 | -4.67451100 | 1.18877700  |
| C  | -4.89953900 | -5.14850400 | 0.99395300  |
| H  | -4.64371900 | -4.91053200 | -1.12695000 |
| C  | -2.90579100 | -4.91893400 | 2.33837900  |
| H  | -1.09776000 | -4.46315200 | 1.27696000  |

|   |             |             |             |
|---|-------------|-------------|-------------|
| C | -4.28049100 | -5.15165200 | 2.24558200  |
| H | -5.96774000 | -5.32779600 | 0.91371200  |
| H | -2.41664100 | -4.91256300 | 3.30807800  |
| H | -4.86446100 | -5.33187400 | 3.14321600  |
| C | -2.90564900 | -4.31583100 | -3.00063000 |
| C | -3.82162100 | -3.26932600 | -3.20166200 |
| C | -2.92755500 | -5.42494500 | -3.86194700 |
| C | -4.73909400 | -3.33511400 | -4.24858600 |
| H | -3.81151800 | -2.41496900 | -2.53618400 |
| C | -3.83416800 | -5.47385800 | -4.91856700 |
| H | -2.23442100 | -6.24352600 | -3.70373900 |
| C | -4.74557600 | -4.43133200 | -5.11340800 |
| H | -5.44599100 | -2.52301900 | -4.39299300 |
| H | -3.83582900 | -6.33143300 | -5.58514700 |
| H | -5.45755900 | -4.47630800 | -5.93244400 |

---

**Table S12.**

Structure: **TS-1b**, Energy= -3941.497894 Hartree, Charge= 0, Multiplicity=2

The number of the imaginary frequencies: 1,  $\nu = -226.9 \text{ cm}^{-1}$

---

| Center | Coordinates (Angstroms) |             |             |
|--------|-------------------------|-------------|-------------|
| Number | X                       | Y           | Z           |
| C      | 1.25307800              | 2.95791600  | -0.00702700 |
| C      | 1.16355200              | 1.59456900  | -0.36017500 |
| C      | 0.78800200              | 0.55087600  | 0.68464800  |
| H      | 1.26508900              | 0.87989700  | 1.61203000  |
| C      | 1.32476800              | -0.84691300 | 0.35496300  |

|   |             |             |             |
|---|-------------|-------------|-------------|
| H | 0.81044100  | -1.28566800 | -0.50890000 |
| H | 1.16292300  | -1.51797300 | 1.20459100  |
| H | 2.39784500  | -0.82287000 | 0.15359500  |
| C | -0.72770100 | 0.46567600  | 0.94532500  |
| H | -1.12104800 | 1.37965400  | 1.39393800  |
| H | -0.94286800 | -0.35881200 | 1.63623700  |
| H | -1.27523500 | 0.27077900  | 0.01498600  |
| C | 1.46653800  | 1.23368300  | -1.67703600 |
| H | 1.40219300  | 0.19297900  | -1.97625700 |
| C | 1.86909800  | 2.18578700  | -2.61216500 |
| H | 2.10059300  | 1.88388100  | -3.63028100 |
| C | 1.98928400  | 3.52107400  | -2.23579400 |
| H | 2.32051100  | 4.25297900  | -2.96575700 |
| C | 1.68660400  | 3.92919600  | -0.93239600 |
| C | 1.86577800  | 5.37825400  | -0.49831500 |
| H | 1.14987000  | 5.57592600  | 0.30526800  |
| C | 3.27252300  | 5.58088100  | 0.09452800  |
| H | 3.45889800  | 4.86687000  | 0.90082200  |
| H | 3.38729200  | 6.59847000  | 0.48757600  |
| H | 4.03974700  | 5.42071700  | -0.67272300 |
| C | 1.59077900  | 6.39676400  | -1.61214700 |
| H | 2.34370000  | 6.34832000  | -2.40706200 |
| H | 1.61543900  | 7.41323400  | -1.20347000 |
| H | 0.60751700  | 6.23598700  | -2.06876200 |
| C | -1.30098300 | 3.85632900  | 0.33561300  |
| H | -1.27001300 | 2.95330400  | -0.27601500 |
| H | -1.03552700 | 4.69360000  | -0.32077000 |
| H | -2.32251500 | 4.01397200  | 0.68840700  |
| C | -0.33500800 | 3.79443300  | 1.50665500  |

|    |             |             |            |
|----|-------------|-------------|------------|
| C  | -0.83256600 | 4.27007800  | 2.72984200 |
| H  | -1.88398500 | 4.52681800  | 2.75499500 |
| C  | -0.09153800 | 4.55874100  | 3.88273200 |
| C  | -0.83409300 | 5.19394200  | 5.03907200 |
| H  | -1.89359600 | 5.31112700  | 4.80505600 |
| H  | -0.42544100 | 6.18175300  | 5.28249700 |
| H  | -0.74659700 | 4.57666000  | 5.94068800 |
| C  | 1.90921400  | 4.82830500  | 5.13941100 |
| H  | 1.43570200  | 4.50957300  | 6.07573300 |
| H  | 1.91954000  | 5.93021000  | 5.16032600 |
| C  | 3.32997100  | 4.34805600  | 5.15310100 |
| C  | 4.16038000  | 4.57683500  | 6.25006300 |
| H  | 3.77079000  | 5.11131400  | 7.11053800 |
| C  | 5.46485500  | 4.09674700  | 6.22893600 |
| H  | 6.12185700  | 4.24997200  | 7.07945600 |
| C  | 5.90693700  | 3.40730700  | 5.09931000 |
| H  | 6.90585100  | 2.99193700  | 5.03980800 |
| C  | 5.02725100  | 3.22750900  | 4.04156900 |
| H  | 5.30692800  | 2.67359300  | 3.15050100 |
| Cu | 2.31166100  | 3.33670700  | 2.70559200 |
| N  | 4.45363100  | 1.64188200  | 1.65687400 |
| N  | 0.91466800  | 3.36372500  | 1.32166300 |
| N  | 1.21347600  | 4.32963700  | 3.97179900 |
| N  | 3.76044100  | 3.68095000  | 4.06543100 |
| O  | 3.45231300  | 2.41781300  | 1.42720900 |
| O  | 3.96179400  | 0.33823500  | 1.98394600 |
| P  | 3.55981200  | -0.13964500 | 3.66394700 |
| C  | 2.26300700  | 0.43768400  | 4.74246300 |
| C  | 0.91056700  | 0.23869500  | 4.33442300 |

|   |             |             |            |
|---|-------------|-------------|------------|
| C | 2.48939200  | 1.31678100  | 5.83721500 |
| C | -0.13929200 | 0.83320600  | 5.01734900 |
| H | 0.69658700  | -0.39426100 | 3.48041200 |
| C | 1.42472200  | 1.87974800  | 6.52701600 |
| H | 3.50039300  | 1.54445500  | 6.15097300 |
| C | 0.10119300  | 1.65065100  | 6.13072100 |
| H | -1.15746200 | 0.65540600  | 4.68208000 |
| H | 1.63225300  | 2.51034500  | 7.38777500 |
| H | -0.72390800 | 2.10180600  | 6.67264200 |
| C | 5.15200500  | -0.08519600 | 4.51733100 |
| C | 5.26042600  | -0.28553200 | 5.90520000 |
| C | 6.32256300  | 0.11414600  | 3.76359300 |
| C | 6.50351000  | -0.23257700 | 6.52973100 |
| H | 4.37396100  | -0.48948200 | 6.49540200 |
| C | 7.56601900  | 0.15156000  | 4.39440100 |
| H | 6.25169400  | 0.25337500  | 2.69216700 |
| C | 7.66116100  | -0.00841800 | 5.77770400 |
| H | 6.57084100  | -0.38210000 | 7.60343500 |
| H | 8.46188300  | 0.31069300  | 3.80112100 |
| H | 8.63015600  | 0.02813800  | 6.26670900 |
| C | 3.19454800  | -1.86461400 | 3.24275400 |
| C | 3.87338100  | -2.48200000 | 2.17706400 |
| C | 2.31455800  | -2.63129900 | 4.02453100 |
| C | 3.64995100  | -3.82617700 | 1.88578400 |
| H | 4.55924100  | -1.90095100 | 1.57343300 |
| C | 2.08532900  | -3.97151300 | 3.71945700 |
| H | 1.80492500  | -2.17873400 | 4.86746100 |
| C | 2.74985500  | -4.57373000 | 2.64798900 |
| H | 4.17653200  | -4.28865800 | 1.05587700 |

|   |            |             |            |
|---|------------|-------------|------------|
| H | 1.39209000 | -4.54767700 | 4.32549700 |
| H | 2.57207800 | -5.61924900 | 2.41377200 |

---

**Table S13.**

Structure: **TS-3a**, Energy= -3941.507181 Hartree, Charge= 0, Multiplicity=2

The number of the imaginary frequencies: 1,  $\nu = -323.8 \text{ cm}^{-1}$

---

| Center<br>Number | Coordinates (Angstroms) |             |            |
|------------------|-------------------------|-------------|------------|
|                  | X                       | Y           | Z          |
| C                | -1.55945600             | -0.27245100 | 1.23038400 |
| C                | -1.38722200             | -1.08348500 | 2.37364400 |
| C                | -0.10491500             | -1.00196200 | 3.19005400 |
| H                | 0.33495900              | -0.01421900 | 3.02703100 |
| C                | 0.90687700              | -2.03634000 | 2.66419600 |
| H                | 0.53743800              | -3.05577700 | 2.82711400 |
| H                | 1.87345400              | -1.93388500 | 3.17252400 |
| H                | 1.06385900              | -1.90679800 | 1.59104300 |
| C                | -0.32389400             | -1.16122200 | 4.70033800 |
| H                | -1.06778600             | -0.44789500 | 5.07309900 |
| H                | 0.61581800              | -0.98592200 | 5.23638800 |
| H                | -0.66423600             | -2.16956600 | 4.96181400 |
| C                | -2.38592900             | -2.00612200 | 2.69791700 |
| H                | -2.27022800             | -2.63725500 | 3.57396400 |
| C                | -3.52841900             | -2.12966900 | 1.91086200 |
| H                | -4.30073900             | -2.84590100 | 2.17859900 |
| C                | -3.67054400             | -1.34454300 | 0.76893800 |
| H                | -4.55367500             | -1.46668600 | 0.15086800 |



|   |             |             |             |
|---|-------------|-------------|-------------|
| C | -2.69082200 | -0.41626700 | 0.39785200  |
| C | -2.82901400 | 0.40682500  | -0.87727100 |
| H | -1.81651900 | 0.52323300  | -1.27465800 |
| C | -3.66482400 | -0.29570800 | -1.95339700 |
| H | -4.72297600 | -0.35545800 | -1.67126000 |
| H | -3.30227000 | -1.31066200 | -2.14124800 |
| H | -3.60625000 | 0.26267600  | -2.89082300 |
| C | -3.39096200 | 1.81809500  | -0.62823700 |
| H | -3.50744400 | 2.34763100  | -1.58185000 |
| H | -2.73132100 | 2.41557100  | 0.00517200  |
| H | -4.37553100 | 1.76839000  | -0.14723200 |
| C | -1.65252900 | 2.18931600  | 2.47692400  |
| H | -2.63257500 | 1.82861800  | 2.15979600  |
| H | -1.70658700 | 3.26658200  | 2.65023300  |
| H | -1.43044000 | 1.70465500  | 3.43570900  |
| C | -0.56224100 | 1.85879800  | 1.47155000  |
| C | 0.41618700  | 2.85313900  | 1.28221300  |
| H | 0.22646200  | 3.80248900  | 1.76815000  |
| C | 1.66470400  | 2.72512600  | 0.64777200  |
| C | 2.60080400  | 3.91410100  | 0.70808300  |
| H | 2.97572800  | 4.16321400  | -0.28938000 |
| H | 3.46767900  | 3.70332600  | 1.34691600  |
| H | 2.09125900  | 4.79084200  | 1.11248000  |
| C | 3.38703000  | 1.45359500  | -0.45109600 |
| H | 4.13773100  | 1.95621900  | 0.17086200  |
| H | 3.49036700  | 1.87746700  | -1.46434500 |
| C | 3.73369300  | -0.01661500 | -0.52164600 |
| C | 5.04052000  | -0.46224400 | -0.72287200 |
| H | 5.84668300  | 0.25923300  | -0.80819900 |

|    |             |             |             |
|----|-------------|-------------|-------------|
| C  | 5.28496800  | -1.82871900 | -0.81607700 |
| H  | 6.29462100  | -2.19600600 | -0.97108600 |
| C  | 4.21284400  | -2.71858200 | -0.71038600 |
| H  | 4.35827800  | -3.79068800 | -0.78114400 |
| C  | 2.93896300  | -2.20159500 | -0.52076700 |
| H  | 2.05779500  | -2.83492300 | -0.46934200 |
| Cu | 0.91474600  | 0.05080900  | -0.29788900 |
| N  | -0.54469400 | 0.66292400  | 0.88309900  |
| N  | 2.03804600  | 1.60823400  | 0.04592100  |
| N  | 2.70763000  | -0.88169800 | -0.42448800 |
| N  | -0.05499600 | -1.38423000 | -1.23337500 |
| O  | 0.58985900  | -1.37965500 | -2.50309000 |
| O  | -0.11198400 | -2.54100200 | -0.79340000 |
| P  | 0.65706700  | 0.46628300  | -3.11399500 |
| C  | -0.89139900 | 0.37233400  | -4.09523800 |
| C  | -1.35719900 | -0.88789300 | -4.51107300 |
| C  | -1.57689100 | 1.51774000  | -4.53068800 |
| C  | -2.47627900 | -0.99529200 | -5.33302100 |
| H  | -0.83739800 | -1.77842000 | -4.18196800 |
| C  | -2.70530600 | 1.40449000  | -5.34409400 |
| H  | -1.23223000 | 2.50295600  | -4.24435700 |
| C  | -3.15874400 | 0.14919800  | -5.75031000 |
| H  | -2.81858600 | -1.97809000 | -5.64423000 |
| H  | -3.22364400 | 2.30343500  | -5.66533300 |
| H  | -4.03422500 | 0.06330400  | -6.38738300 |
| C  | 0.91869100  | 2.31697300  | -2.97264900 |
| C  | 2.03887900  | 2.98696000  | -3.48776100 |
| C  | 0.01866200  | 3.03239200  | -2.16383500 |
| C  | 2.22066000  | 4.35059300  | -3.24275700 |

|   |             |             |             |
|---|-------------|-------------|-------------|
| H | 2.76171600  | 2.45398200  | -4.09516700 |
| C | 0.19144100  | 4.39395800  | -1.93511000 |
| H | -0.81488500 | 2.51599200  | -1.69821900 |
| C | 1.29422400  | 5.06044000  | -2.47724500 |
| H | 3.08639600  | 4.85863700  | -3.65918800 |
| H | -0.52111100 | 4.92818200  | -1.31398800 |
| H | 1.43795900  | 6.12065700  | -2.29026100 |
| C | 1.97821200  | 0.01244100  | -4.29684600 |
| C | 3.09431400  | -0.72583400 | -3.88567600 |
| C | 1.90322200  | 0.45610500  | -5.62534100 |
| C | 4.12604200  | -1.00327600 | -4.78282000 |
| H | 3.14743200  | -1.09779700 | -2.87351800 |
| C | 2.93220800  | 0.17301100  | -6.52284300 |
| H | 1.03904900  | 1.02339200  | -5.95724800 |
| C | 4.04861200  | -0.55383300 | -6.10181000 |
| H | 4.98624400  | -1.57579800 | -4.44792600 |
| H | 2.86148100  | 0.51847500  | -7.55017800 |
| H | 4.85055600  | -0.77280100 | -6.80094300 |

---

**Table S14.**

Structure: **TS-4a**, Energy= -4978.120717 Hartree, Charge= 0, Multiplicity=2

The number of the imaginary frequencies: 1,  $\nu = -115.6 \text{ cm}^{-1}$

---

| Center<br>Number | Coordinates (Angstroms) |            |            |
|------------------|-------------------------|------------|------------|
|                  | X                       | Y          | Z          |
| C                | -1.92357200             | 0.51957900 | 1.60821700 |
| C                | -1.81353700             | 0.15648600 | 2.96685700 |

---

|   |             |             |             |
|---|-------------|-------------|-------------|
| C | -0.77945400 | 0.79441800  | 3.88633900  |
| H | -0.32475900 | 1.63080400  | 3.34881300  |
| C | 0.35072800  | -0.19154200 | 4.23116200  |
| H | -0.04311100 | -1.05926300 | 4.77488700  |
| H | 1.09937100  | 0.29442700  | 4.86930000  |
| H | 0.83338800  | -0.55930000 | 3.32341700  |
| C | -1.41337900 | 1.35382500  | 5.17162200  |
| H | -2.23907900 | 2.03940300  | 4.95211100  |
| H | -0.66447100 | 1.89823000  | 5.75863300  |
| H | -1.80856200 | 0.55174800  | 5.80561900  |
| C | -2.67209600 | -0.82743600 | 3.46998100  |
| H | -2.59194000 | -1.12290400 | 4.51256500  |
| C | -3.62261600 | -1.43447000 | 2.65606300  |
| H | -4.28329200 | -2.19675900 | 3.06034700  |
| C | -3.71999400 | -1.06716000 | 1.31505200  |
| H | -4.46157000 | -1.55055200 | 0.68842000  |
| C | -2.87157300 | -0.10312500 | 0.76189000  |
| C | -2.96124900 | 0.26960000  | -0.71432400 |
| H | -1.93163700 | 0.39901200  | -1.06584500 |
| C | -3.61778400 | -0.80726200 | -1.58701200 |
| H | -4.68069300 | -0.92839600 | -1.34508600 |
| H | -3.13217900 | -1.78041400 | -1.48263800 |
| H | -3.55073000 | -0.51628200 | -2.63745100 |
| C | -3.70407800 | 1.59910700  | -0.94672700 |
| H | -3.76473000 | 1.80833800  | -2.02138300 |
| H | -3.20421200 | 2.44383800  | -0.47019300 |
| H | -4.72699600 | 1.54292900  | -0.55468400 |
| C | -2.55208300 | 3.18720500  | 1.98084900  |
| H | -3.39721800 | 2.52131700  | 1.80025000  |

|    |             |             |             |
|----|-------------|-------------|-------------|
| H  | -2.84036700 | 4.20881900  | 1.72197500  |
| H  | -2.34568100 | 3.16115900  | 3.05663300  |
| C  | -1.31173400 | 2.76995400  | 1.20816900  |
| C  | -0.51605000 | 3.82686100  | 0.73469200  |
| H  | -0.91424800 | 4.82399300  | 0.87600800  |
| C  | 0.75783500  | 3.74645500  | 0.14999400  |
| C  | 1.42347400  | 5.04748400  | -0.24641900 |
| H  | 1.74065100  | 5.01416300  | -1.29372500 |
| H  | 2.31217400  | 5.24541600  | 0.36547500  |
| H  | 0.73645000  | 5.88664600  | -0.12491800 |
| C  | 2.73065600  | 2.57340200  | -0.55018300 |
| H  | 3.33342900  | 3.41858600  | -0.19904000 |
| H  | 2.74829400  | 2.62248000  | -1.65274400 |
| C  | 3.40746200  | 1.29619200  | -0.12018300 |
| C  | 4.78807800  | 1.11859800  | -0.20022500 |
| H  | 5.41289400  | 1.92941500  | -0.56037500 |
| C  | 5.33844100  | -0.10450600 | 0.17613500  |
| H  | 6.41063100  | -0.26389500 | 0.11422100  |
| C  | 4.49501700  | -1.11277600 | 0.64542000  |
| H  | 4.87325000  | -2.07797300 | 0.96172500  |
| C  | 3.13041900  | -0.85956200 | 0.70229000  |
| H  | 2.42512600  | -1.59060500 | 1.07648100  |
| Cu | 0.63572500  | 0.79096200  | 0.19493100  |
| N  | -1.02271500 | 1.47681300  | 1.05502000  |
| N  | 1.37193500  | 2.59117300  | -0.04808500 |
| N  | 2.59741500  | 0.31165100  | 0.31409500  |
| N  | 0.04091100  | -1.09406400 | 0.29529700  |
| O  | 0.43529400  | -1.81401800 | -0.89400400 |
| O  | 0.37713100  | -1.70725400 | 1.34516400  |

|   |             |             |             |
|---|-------------|-------------|-------------|
| P | 0.45427600  | 0.84047000  | -2.82958200 |
| C | -0.90823300 | 0.09002300  | -3.82543800 |
| C | -0.97707900 | -1.31285500 | -3.84862600 |
| C | -1.85124500 | 0.82714000  | -4.55329500 |
| C | -1.95295700 | -1.96104400 | -4.60191300 |
| H | -0.26682600 | -1.89288500 | -3.27393000 |
| C | -2.83897300 | 0.17392600  | -5.29581400 |
| H | -1.81519600 | 1.91099200  | -4.54919200 |
| C | -2.88944400 | -1.22034900 | -5.32787100 |
| H | -1.98204400 | -3.04646600 | -4.61303300 |
| H | -3.56314700 | 0.75916900  | -5.85619400 |
| H | -3.65463100 | -1.72575600 | -5.91044200 |
| C | 0.27886400  | 2.63268800  | -3.21338300 |
| C | 1.15126400  | 3.35940700  | -4.03497500 |
| C | -0.77422700 | 3.31290500  | -2.58089900 |
| C | 0.96109800  | 4.72949700  | -4.23400900 |
| H | 1.97842000  | 2.85796300  | -4.52550000 |
| C | -0.97600200 | 4.67411800  | -2.79511300 |
| H | -1.42872500 | 2.77595600  | -1.90373200 |
| C | -0.10743500 | 5.38835300  | -3.62410500 |
| H | 1.64707900  | 5.27916600  | -4.87278100 |
| H | -1.79767800 | 5.17938100  | -2.29598800 |
| H | -0.25598100 | 6.45248300  | -3.78386700 |
| C | 1.89831500  | 0.35443300  | -3.87144100 |
| C | 3.10595300  | 0.03008800  | -3.24272500 |
| C | 1.83601600  | 0.31299800  | -5.27326300 |
| C | 4.23734000  | -0.30264500 | -3.99034800 |
| H | 3.15750000  | 0.01205600  | -2.16273500 |
| C | 2.96204400  | -0.02240800 | -6.02339400 |

|   |             |             |             |
|---|-------------|-------------|-------------|
| H | 0.90191500  | 0.54455200  | -5.77565600 |
| C | 4.16835900  | -0.32587800 | -5.38364300 |
| H | 5.16424500  | -0.55057300 | -3.48088700 |
| H | 2.90026700  | -0.04843300 | -7.10772500 |
| H | 5.04514300  | -0.58574700 | -5.96989700 |
| P | 1.05840200  | -3.52111100 | -0.58430500 |
| C | -0.40019000 | -4.37856100 | 0.05636800  |
| C | -1.65840900 | -3.75935500 | 0.01082500  |
| C | -0.29854800 | -5.68864800 | 0.55408700  |
| C | -2.79199000 | -4.43873900 | 0.45133100  |
| H | -1.73874300 | -2.74208700 | -0.34645900 |
| C | -1.43510400 | -6.36056200 | 1.00089900  |
| H | 0.66875400  | -6.17758400 | 0.59053700  |
| C | -2.68578000 | -5.73946000 | 0.94743200  |
| H | -3.75654900 | -3.94222800 | 0.41913300  |
| H | -1.34387600 | -7.37219800 | 1.38592200  |
| H | -3.57077000 | -6.26579400 | 1.29338000  |
| C | 2.48498600  | -4.25027300 | 0.20993600  |
| C | 3.69967700  | -4.51719900 | -0.48061300 |
| C | 2.52076700  | -4.26985100 | 1.63606300  |
| C | 4.86477900  | -4.81096800 | 0.21582500  |
| H | 3.71372400  | -4.51900300 | -1.56488600 |
| C | 3.69287100  | -4.56669800 | 2.31490400  |
| H | 1.61753900  | -4.03922100 | 2.19207600  |
| C | 4.88180000  | -4.83618700 | 1.61787800  |
| H | 5.77175500  | -5.03538600 | -0.34053900 |
| H | 3.68645400  | -4.58637700 | 3.40190800  |
| H | 5.79730000  | -5.06293300 | 2.15552600  |
| C | 1.18061500  | -3.86614300 | -2.35967500 |

|   |             |             |             |
|---|-------------|-------------|-------------|
| C | 2.15466700  | -3.20769800 | -3.12659800 |
| C | 0.26572300  | -4.71647800 | -2.99768900 |
| C | 2.21720400  | -3.39978100 | -4.50506900 |
| H | 2.84759700  | -2.52444800 | -2.65129300 |
| C | 0.32932000  | -4.90443100 | -4.37872100 |
| H | -0.49913800 | -5.22114700 | -2.41739500 |
| C | 1.30167800  | -4.24582600 | -5.13459800 |
| H | 2.96448300  | -2.86748500 | -5.08377100 |
| H | -0.38498800 | -5.56323900 | -4.86423800 |
| H | 1.34122600  | -4.38640000 | -6.21083000 |

---

**Table S15.**

Structure: **PPh<sub>3</sub>**, Energy= -1036.585477 Hartree, Charge= 0, Multiplicity=1

The number of the imaginary frequencies: 0

---

| Center<br>Number | Coordinates (Angstroms) |             |             |
|------------------|-------------------------|-------------|-------------|
|                  | X                       | Y           | Z           |
| P                | -0.00356400             | -0.00242500 | -1.26640800 |
| C                | -1.64234600             | 0.20189800  | -0.44119300 |
| C                | -2.54189500             | 1.11370600  | -1.01634800 |
| H                | -2.25918900             | 1.65050200  | -1.91874300 |
| C                | -3.79256800             | 1.33918700  | -0.44218900 |
| H                | -4.47558100             | 2.05147700  | -0.89643100 |
| C                | -4.16895200             | 0.64188700  | 0.70825600  |
| H                | -5.14588100             | 0.80994400  | 1.15245000  |
| C                | -3.28678200             | -0.27592700 | 1.28141300  |
| H                | -3.57475600             | -0.82243200 | 2.17528500  |



|   |             |             |             |
|---|-------------|-------------|-------------|
| C | -2.03027400 | -0.49332200 | 0.71288100  |
| H | -1.34866600 | -1.20344400 | 1.16946600  |
| C | 0.64360500  | -1.52292500 | -0.44335000 |
| C | 0.32480500  | -2.75747500 | -1.03086200 |
| H | -0.26772000 | -2.78148200 | -1.94228700 |
| C | 0.75910100  | -3.95249000 | -0.45782500 |
| H | 0.50053200  | -4.90007100 | -0.92197300 |
| C | 1.53366700  | -3.92878600 | 0.70432900  |
| H | 1.87970200  | -4.85803200 | 1.14785400  |
| C | 1.86605800  | -2.70592600 | 1.29046200  |
| H | 2.46952900  | -2.68146100 | 2.19369500  |
| C | 1.42228400  | -1.51028000 | 0.72264700  |
| H | 1.67976600  | -0.56482000 | 1.18872400  |
| C | 0.99396000  | 1.31758000  | -0.44715500 |
| C | 0.58729500  | 2.00504000  | 0.70512800  |
| H | -0.36806900 | 1.77143200  | 1.16345400  |
| C | 1.40473700  | 2.98612600  | 1.26957900  |
| H | 1.07667300  | 3.51172500  | 2.16217000  |
| C | 2.64015600  | 3.28889900  | 0.69408500  |
| H | 3.27493500  | 4.05211600  | 1.13510300  |
| C | 3.05436300  | 2.61036400  | -0.45458800 |
| H | 4.01233600  | 2.84386800  | -0.91063100 |
| C | 2.23287400  | 1.63833200  | -1.02465000 |
| H | 2.55532100  | 1.12196800  | -1.92565300 |

---

**Table S16.**

Structure: **OPPh<sub>3</sub>**, Energy= -1111.875431 Hartree, Charge= 0, Multiplicity=1

The number of the imaginary frequencies: 0

---

| Center | Coordinates (Angstroms) |             |             |
|--------|-------------------------|-------------|-------------|
| Number | X                       | Y           | Z           |
| P      | 0.00509500              | -0.03168600 | 0.95129700  |
| C      | -0.03067600             | 1.66797100  | 0.30391200  |
| C      | -1.22317100             | 2.40491700  | 0.38625400  |
| H      | -2.12532300             | 1.93536700  | 0.76730600  |
| C      | -1.25759100             | 3.73402400  | -0.03015700 |
| H      | -2.18464000             | 4.29614500  | 0.03174200  |
| C      | -0.10140600             | 4.33980700  | -0.52959500 |
| H      | -0.12967000             | 5.37505200  | -0.85679200 |
| C      | 1.08878900              | 3.61506600  | -0.60922000 |
| H      | 1.98806700              | 4.08436300  | -0.99699500 |
| C      | 1.12602000              | 2.28357600  | -0.19345800 |
| H      | 2.05252600              | 1.72296400  | -0.26063900 |
| C      | 1.45865600              | -0.82076300 | 0.18877700  |
| C      | 2.50621700              | -1.21517600 | 1.02956000  |
| H      | 2.41478100              | -1.05200700 | 2.09846600  |
| C      | 3.64695700              | -1.81469500 | 0.49303300  |
| H      | 4.45686900              | -2.11979500 | 1.14912200  |
| C      | 3.74429000              | -2.02183800 | -0.88368700 |
| H      | 4.63148600              | -2.48882200 | -1.30144400 |
| C      | 2.69918400              | -1.63202700 | -1.72659700 |
| H      | 2.77266900              | -1.79634200 | -2.79756800 |
| C      | 1.55880500              | -1.03456500 | -1.19349500 |
| H      | 0.74876600              | -0.74004600 | -1.85353100 |
| C      | -1.44942200             | -0.85026700 | 0.22599000  |
| C      | -1.94198200             | -0.53193400 | -1.04803200 |

---

|   |             |             |             |
|---|-------------|-------------|-------------|
| H | -1.49298600 | 0.27267800  | -1.62198800 |
| C | -3.02699400 | -1.23291200 | -1.57390800 |
| H | -3.40636800 | -0.98003100 | -2.55954900 |
| C | -3.62889700 | -2.25082300 | -0.83046500 |
| H | -4.47573300 | -2.79345200 | -1.24041800 |
| C | -3.14735800 | -2.56611300 | 0.44207100  |
| H | -3.61971000 | -3.35189700 | 1.02417900  |
| C | -2.06060000 | -1.86897200 | 0.96940900  |
| H | -1.68562300 | -2.10025500 | 1.96145900  |
| O | 0.03629300  | -0.13243400 | 2.45828200  |

---

**Table S17.**

Structure: **NO**, Energy= -129.932018 Hartree, Charge= 0, Multiplicity=2

The number of the imaginary frequencies: 0

---

| Center<br>Number | Coordinates (Angstroms) |             |            |
|------------------|-------------------------|-------------|------------|
|                  | X                       | Y           | Z          |
| N                | 0.58675200              | -0.25121600 | 0.00710700 |
| O                | -0.57194500             | -0.25121600 | 0.00710700 |

---
